1 An improved pig reference genome sequence to enable pig genetics and genomics research

2

3 Amanda Warr<sup>1</sup>, Nabeel Affara<sup>2</sup>, Bronwen Aken<sup>3</sup>, H. Beiki<sup>4</sup>, Derek M. Bickhart<sup>5</sup>, Konstantinos Billis<sup>3</sup>,  
4 William Chow<sup>6</sup>, Lel Eory<sup>1</sup>, Heather A. Finlayson<sup>1</sup>, Paul Flicek<sup>3</sup>, Carlos G. Girón<sup>3</sup>, Darren K. Griffin<sup>7</sup>,  
5 Richard Hall<sup>8</sup>, Greg Hannum<sup>9</sup>, Thibaut Hourlier<sup>3</sup>, Kerstin Howe<sup>6</sup>, David A. Hume<sup>1,†</sup>, Osagie Izuogu<sup>3</sup>, Kristi  
6 Kim<sup>8</sup>, Sergey Koren<sup>10</sup>, Haibou Liu<sup>4</sup>, Nancy Manchanda<sup>11</sup>, Fergal J. Martin<sup>3</sup>, Dan J. Nonneman<sup>12</sup>, Rebecca  
7 E. O'Connor<sup>7</sup>, Adam M. Phillippy<sup>10</sup>, Gary A. Rohrer<sup>12</sup>, Benjamin D. Rosen<sup>13</sup>, Laurie A. Rund<sup>14</sup>, Carole A.  
8 Sargent<sup>2</sup>, Lawrence B. Schook<sup>14</sup>, Steven G. Schroeder<sup>13</sup>, Ariel S. Schwartz<sup>9</sup>, Ben M. Skinner<sup>2</sup>, Richard  
9 Talbot<sup>15</sup>, Elizabeth Tseng<sup>8</sup>, Christopher K. Tuggle<sup>4,11</sup>, Mick Watson<sup>1</sup>, Timothy P. L. Smith<sup>12\*</sup>, Alan L.  
10 Archibald,<sup>1\*</sup>

11

12 Affiliations

13 <sup>1</sup>The Roslin Institute and Royal (Dick) School of Veterinary Studies, University of Edinburgh, Edinburgh  
14 EH25 9RG, U.K.

15 <sup>2</sup>Department of Pathology, University of Cambridge, Cambridge CB2 1QP, U.K.

16 <sup>3</sup>European Molecular Biology Laboratory, European Bioinformatics Institute, Hinxton, CB10 1SD, U.K.

17 <sup>4</sup>Department of Animal Science, Iowa State University, Ames, Iowa, U.S.A.

18 <sup>5</sup>Dairy Forage Research Center, USDA-ARS, Madison, Wisconsin, U.S.A.

19 <sup>6</sup>Wellcome Sanger Institute, Cambridge, CB10 1SA, U.K.

20 <sup>7</sup>School of Biosciences, University of Kent, Canterbury CT2 7AF, U.K.

21 <sup>8</sup>Pacific Biosciences, Menlo Park, California, U.S.A.

22 <sup>9</sup>Denovium Inc., San Diego, California, U.S.A.

23 <sup>10</sup>Genome Informatics Section, Computational and Statistical Genomics Branch, National Human  
24 Genome Research Institute, Bethesda, Maryland, U.S.A.

25 <sup>11</sup>Bioinformatics and Computational Biology Program, Iowa State University, Ames, Iowa, U.S.A.

26 <sup>12</sup>USDA-ARS U.S. Meat Animal Research Center, Clay Center, Nebraska 68933, U.S.A.

27 <sup>13</sup>Animal Genomics and Improvement Laboratory, USDA-ARS, Beltsville, Maryland, U.S.A

28 <sup>14</sup>Department of Animal Sciences, University of Illinois, Urbana, Illinois, U.S.A.

29 <sup>15</sup>Edinburgh Genomics, University of Edinburgh, Edinburgh EH9 3FL, U.K.

30

31 † Current address: Mater Research Institute-University of Queensland, Translational Research  
32 Institute, Brisbane, QLD 4102, Australia

33

34 \*Corresponding authors: [alan.archibald@roslin.ed.ac.uk](mailto:alan.archibald@roslin.ed.ac.uk) [tim.smith@ARS.USDA.GOV](mailto:tim.smith@ARS.USDA.GOV)  
35 [mick.watson@roslin.ed.ac.uk](mailto:mick.watson@roslin.ed.ac.uk)

36

37

38 **Abstract**

39 The domestic pig (*Sus scrofa*) is important both as a food source and as a biomedical model with high  
40 anatomical and immunological similarity to humans. The draft reference genome (Sscrofa10.2) of a  
41 purebred Duroc female pig established using older clone-based sequencing methods was incomplete  
42 and unresolved redundancies, short range order and orientation errors and associated misassembled  
43 genes limited its utility. We present two annotated highly contiguous chromosome-level genome  
44 assemblies created with more recent long read technologies and a whole genome shotgun strategy,  
45 one for the same Duroc female (Sscrofa11.1) and one for an outbred, composite breed male  
46 (USMARCv1.0). Both assemblies are of substantially higher (>90-fold) continuity and accuracy than  
47 Sscrofa10.2. These highly contiguous assemblies plus annotation of a further 11 short read assemblies  
48 provide an unprecedented view of the genetic make-up of this important agricultural and biomedical  
49 model species. We propose that the improved Duroc assembly (Sscrofa11.1) become the reference  
50 genome for genomic research in pigs.

51

52 **Keywords**

53 Pig genomes, reference assembly, pig, genome annotation

54

## 55 **Background**

56 High quality, richly annotated reference genome sequences are key resources and provide important  
57 frameworks for the discovery and analysis of genetic variation and for linking genotypes to function.

58 In farmed animal species such as the domestic pig (*Sus scrofa*) genome sequences have been integral  
59 to the discovery of molecular genetic variants and the development of single nucleotide  
60 polymorphism (SNP) chips [1] and enabled efforts to dissect the genetic control of complex traits,  
61 including responses to infectious diseases [2].

62

63 Genome sequences are not only an essential resource for enabling research but also for applications  
64 in the life sciences. Genomic selection, in which associations between thousands of SNPs and trait  
65 variation as established in a phenotyped training population are used to choose amongst selection  
66 candidates for which there are SNP data but no phenotypes, has delivered genomics-enabled genetic  
67 improvement in farmed animals [3] and plants. From its initial successful application in dairy cattle  
68 breeding, genomic selection is now being used in many sectors within animal and plant breeding,  
69 including by leading pig breeding companies [4, 5].

70

71 The domestic pig (*Sus scrofa*) has importance not only as a source of animal protein but also as a  
72 biomedical model. The choice of the optimal animal model species for pharmacological or toxicology  
73 studies can be informed by knowledge of the genome and gene content of the candidate species  
74 including pigs [6]. A high quality, richly annotated genome sequence is also essential when using gene  
75 editing technologies to engineer improved animal models for research or as sources of cells and tissue  
76 for xenotransplantation and potentially for improved productivity [7, 8].

77

78 The highly contiguous pig genome sequences reported here are built upon a quarter of a century of  
79 effort by the global pig genetics and genomics research community including the development of

80 recombination and radiation hybrid maps [9, 10], cytogenetic and Bacterial Artificial Chromosome  
81 (BAC) physical maps [11, 12] and a draft reference genome sequence [13].

82

83 The previously published draft pig reference genome sequence (Sscrofa10.2), developed under the  
84 auspices of the Swine Genome Sequencing Consortium (SGSC), has a number of significant deficiencies  
85 [14-17]. The BAC-by-BAC hierarchical shotgun sequence approach [18] using Sanger sequencing  
86 technology can yield a high quality genome sequence as demonstrated by the public Human Genome  
87 Project. However, with a fraction of the financial resources of the Human Genome Project, the  
88 resulting draft pig genome sequence comprised an assembly, in which long-range order and  
89 orientation is good, but the order and orientation of sequence contigs within many BAC clones was  
90 poorly supported and the sequence redundancy between overlapping sequenced BAC clones was  
91 often not resolved. Moreover, about 10% of the pig genome, including some important genes, were  
92 not represented (e.g. *CD163*), or incompletely represented (e.g. *IGF2*) in the assembly [19]. Whilst the  
93 BAC clones represent an invaluable resource for targeted sequence improvement and gap closure as  
94 demonstrated for chromosome X (SSCX) [20], a clone-by-clone approach to sequence improvement is  
95 expensive notwithstanding the reduced cost of sequencing with next-generation technologies.

96

97 The dramatically reduced cost of whole genome shotgun sequencing using Illumina short read  
98 technology has facilitated the sequencing of several hundred pig genomes [17, 21, 22]. Whilst a few  
99 of these additional pig genomes have been assembled to contig level, most of these genome  
100 sequences have simply been aligned to the reference and used as a resource for variant discovery.

101

102 The increased capability and reduced cost of third generation long read sequencing technology as  
103 delivered by Pacific Biosciences and Oxford Nanopore platforms, have created the opportunity to  
104 generate the data from which to build highly contiguous genome sequences as illustrated recently for  
105 cattle [23, 24]. Here we describe the use of Pacific Biosciences (PacBio) long read technology to

106 establish highly continuous pig genome sequences that provide substantially improved resources for

107 pig genetics and genomics research and applications.

108

## 109 **Results**

110 Two individual pigs were sequenced independently: a) TJ Tabasco (Duroc 2-14) i.e. the sow that was  
111 the primary source of DNA for the published draft genome sequence (Sscrofa10.2) [13] and b)  
112 MARC1423004 which was a Duroc/Landrace/Yorkshire crossbred barrow (i.e. castrated male pig) from  
113 the USDA Meat Animal Research Center. The former allowed us to build upon the earlier draft genome  
114 sequence, exploit the associated CHORI-242 BAC library resource (<https://bacpacresources.org/>  
115 <http://bacpacresources.org/porcine242.htm>) and evaluate the improvements achieved by  
116 comparison with Sscrofa10.2. The latter allowed us to assess the relative efficacy of a simpler whole  
117 genome shotgun sequencing and Chicago Hi-Rise scaffolding strategy [25]. This second assembly also  
118 provided data for the Y chromosome, and supported comparison of haplotypes between individuals.  
119 In addition, full-length transcript sequences were collected for multiple tissues from the  
120 MARC1423004 animal, and used in annotating both genomes.

121

### 122 Sscrofa11.1 assembly

123 Approximately sixty-five fold coverage (176 Gb) of the genome of TJ Tabasco (Duroc 2-14) was  
124 generated using Pacific Biosciences (PacBio) single-molecule real-time (SMRT) sequencing technology.  
125 A total of 213 SMRT cells produced 12,328,735 subreads of average length 14,270 bp and with a read  
126 N50 of 19,786 bp (Table S1). Reads were corrected and assembled using Falcon (v.0.4.0) [26],  
127 achieving a minimum corrected read cutoff of 13 kb that provided 19-fold genome coverage for input  
128 resulting in an initial assembly comprising 3,206 contigs with a contig N50 of 14.5 Mb.

129

130 The contigs were mapped to the previous draft assembly (Sscrofa10.2) using Nucmer [27]. The long  
131 range order of the Sscrofa10.2 assembly was based on fingerprint contig (FPC) [12] and radiation  
132 hybrid physical maps with assignments to chromosomes based on fluorescent *in situ* hybridisation  
133 data. This alignment of Sscrofa10.2 and the contigs from the initial Falcon assembly of the PacBio data  
134 provided draft scaffolds that were tested for consistency with paired BAC and fosmid end sequences

135 and the radiation hybrid map [9]. The draft scaffolds also provided a framework for gap closure using  
136 PBJelly [28], or finished quality Sanger sequence data generated from CHORI-242 BAC clones from  
137 earlier work [13, 20].

138

139 Remaining gaps between contigs within scaffolds, and between scaffolds predicted to be adjacent on  
140 the basis of other available data, were targeted for gap filling with a combination of unplaced contigs  
141 and previously sequenced BACs, or by identification and sequencing of BAC clones predicted from  
142 their end sequences to span the gaps. The combination of methods filled 2,501 gaps and reduced the  
143 number of contigs in the assembly from 3,206 to 705. The assembly, Sscrofa11 (GCA\_000003025.5),  
144 had a final contig N50 of 48.2 Mb, only 103 gaps in the sequences assigned to chromosomes, and only  
145 583 remaining unplaced contigs (Table 1). Two acrocentric chromosomes (SSC16, SSC18) were each  
146 represented by single, unbroken contigs. The SSC18 assembly also includes centromeric and telomeric  
147 repeats (Tables S2, S3; Figs. S1, S2), albeit the former probably represent a collapsed version of the  
148 true centromere. The reference genome assembly was completed by adding Y chromosome  
149 sequences from other sources (GCA\_900119615.2) [20] because TJ Tabasco (Duroc 2-14) was female.  
150 The resulting reference genome sequence was termed Sscrofa11.1 and deposited in the public  
151 sequence databases (GCA\_000003025.6) (Table 1).

152

153 The medium to long range order and orientation of Sscrofa11.1 assembly was assessed by comparison  
154 to an existing radiation hybrid (RH) map [9]. The comparison strongly supported the overall accuracy  
155 of the assembly (Fig. 1a), despite the fact that the RH map was prepared from a cell line of a different  
156 individual. There is one major disagreement between the RH map and the assembly on chromosome  
157 3, which will need further investigating. The only other substantial disagreement on chromosome 9,  
158 is explained by a gap in the RH map [9]. The assignment and orientation of the Sscrofa11.1 scaffolds  
159 to chromosomes was confirmed with fluorescent *in situ* hybridisation (FISH) of BAC clones (Table S4,  
160 Fig. S3). The Sscrofa11.1 and USMARCv1.0 assemblies were searched using BLAST with sequences



161 derived from the BAC clones which had been used as probes for the FISH analyses. For most BAC  
162 clones these sequences were BAC end sequences [12], but in some cases these sequences were  
163 incomplete or complete BAC clone sequences [13, 20]. The links between the genome sequence and  
164 the BAC clones used in cytogenetic analyses by fluorescent *in situ* hybridization are summarised in  
165 Table S4. The fluorescent *in situ* hybridization results indicate areas where future assemblies might be  
166 improved. For example, the Sscrofa11.1 unplaced scaffolds contig 1206 and contig1914 may contain  
167 sequences that could be added to end of the long arms of SSC1 and SSC7 respectively.

168

169 The quality of the Sscrofa11 assembly, which corresponds to Sscrofa11.1 after the exclusion of SSCY,  
170 was assessed as described previously for the existing Sanger sequence based draft assembly  
171 (Sscrofa10.2) [14]. Alignments of Illumina sequence reads from the same female pig were used to  
172 identify regions of low quality (LQ) or low coverage (LC) (Table 2). The analysis confirms that Sscrofa11  
173 represents a significant improvement over the Sscrofa10.2 draft assembly. For example, the Low  
174 Quality Low Coverage (LQLC) proportion of the genome sequence has dropped from 33.07% to 16.3%  
175 when repetitive sequence is not masked, and falls to 1.6% when repeats are masked prior to read  
176 alignment. The remaining LQLC segments of Sscrofa11 may represent regions where short read  
177 coverage is low due to known systematic errors of the short read platform related to GC content,  
178 rather than deficiencies of the assembly.

179

180 The Sscrofa11.1 assembly was also assessed visually using gEVAL [29]. The improvement in short range  
181 order and orientation as revealed by alignments with isogenic BAC and fosmid end sequences is  
182 illustrated for a particularly poor region of Sscrofa10.2 on chromosome 12 (Fig. S4). The problems in  
183 this area of Sscrofa10.2 arose from failures to order and orient the sequence contigs and resolve the  
184 redundancies between these sequence contigs within BAC clone CH242-147O24 (FP102566.2). The  
185 improved contiguity in Sscrofa11.1 not only resolves these local order and orientation errors, but also  
186 facilitates the annotation of a complete gene model for the *ABR* locus. Further examples of

187 comparisons of Sscrofa10.2 and Sscrofa11.1 reveal improvements in contiguity, local order and  
188 orientation and gene models (Fig. S5 to S7).

189

#### 190 USMARCv1.0 assembly

191 Approximately sixty-five fold coverage of the genome of the MARC1423004 barrow was generated on  
192 a PacBio RSII instrument. The sequence was collected during the transition from P5/C3 to P6/C4  
193 chemistry, with approximately equal numbers of subreads from each chemistry. A total of 199 cells of  
194 P5/C3 chemistry produced 95.3 Gb of sequence with mean subread length of 5.1 kb and subread N50  
195 of 8.2 kb. A total of 127 cells of P6/C4 chemistry produced 91.6 Gb of sequence with mean subread  
196 length 6.5 kb and subread N50 of 10.3 kb, resulting in an overall average subread length, including  
197 data from both chemistries, of 6.4 kb. The reads were assembled using Celera Assembler 8.3rc2 [30]  
198 and Falcon (<https://pb-falcon.readthedocs.io/en/latest/about.html>). The resulting assemblies were  
199 compared and the Celera Assembler result was selected based on better agreement with a Dovetail  
200 Chicago® library [25], and was used to create a scaffolded assembly with the HiRise™ scaffolder  
201 consisting of 14,818 contigs with a contig N50 of 6.372 Mb (GenBank accession GCA\_002844635.1;  
202 Table 1). The USMARCv1.0 scaffolds were therefore completely independent of the existing  
203 Sscrofa10.2 or new Sscrofa11.1 assemblies, and they can act as supporting evidence where they agree  
204 with those assemblies. However, chromosome assignment of the scaffolds was performed by  
205 alignment to Sscrofa10.2, and does not constitute independent confirmation of this ordering. The  
206 assignment of these scaffolds to individual chromosomes was confirmed post-hoc by FISH analysis as  
207 described for Sscrofa11.1 above. The FISH analysis revealed that several of these chromosome  
208 assemblies (SSC1, 5, 6-11, 13-16) are inverted with respect to the cytogenetic convention for pig  
209 chromosome (Table S4; Figs. S3, S8 to S10). After correcting the orientation of these inverted scaffolds,  
210 there is good agreement between the USMARCv1.0 assembly and the RH map [9] (Fig. 1b).

211

#### 212 Sscrofa11.1 and USMARCv1.0 are co-linear

213 The alignment of the two PacBio assemblies reveals a high degree of agreement and co-linearity, after  
214 correcting the inversions of several USMARCv1.0 chromosome assemblies (Fig. S11). The agreement  
215 between the Sscrofa11.1 and USMARCv1.0 assemblies is also evident in comparisons of specific loci  
216 (Figs. S5 to S7) although with some differences (e.g. Fig. S6). The whole genome alignment of  
217 Sscrofa11.1 and USMARCv1.0 (Fig. S11) masks some inconsistencies that are evident when the  
218 alignments are viewed on a single chromosome-by-chromosome basis (Figs. S8 to S10). It remains to  
219 be determined whether the small differences between the assemblies represent errors in the  
220 assemblies, or true structural variation between the two individuals (see discussion of the *ERLIN1*  
221 locus below).

222

223 Pairwise comparisons amongst the Sscrofa10.2, Sscrofa11.1 and USMARCv1.0 assemblies using the  
224 Assemblytics tools [31] (<http://assemblytics.com>) revealed a peak of insertions and deletion with sizes  
225 of about 300 bp (Figs. S12a to S12c). We assume that these correspond to SINE elements. Despite the  
226 fact that the Sscrofa10.2 and Sscrofa11.1 assemblies are representations of the same pig genome,  
227 there are many more differences between these assemblies than between the Sscrofa11.1 and  
228 USMARCv1.0 assemblies. We conclude that many of the differences between the Sscrofa11.1  
229 assembly and the earlier Sscrofa10.2 assemblies represent improvements in the former. Some of the  
230 differences may indicate local differences in terms of which of the two haploid genomes has been  
231 captured in the assembly. The differences between the Sscrofa11.1 and USMARCv1.0 will represent a  
232 mix of true structural differences and assembly errors that will require further research to resolve.  
233 The Sscrofa11.1 and USMARCv1.0 assemblies were also compared to 11 Illumina short read  
234 assemblies [17] (Table S5a, b, c).

235

### 236 Repetitive sequences, centromeres and telomeres

237 The repetitive sequence content of the Sscrofa11.1 and USMARCv1.0 was identified and  
238 characterised. These analyses allowed the identification of centromeres and telomeres for several

239 chromosomes. The previous reference genome (Sscrofa10.2) that was established from Sanger  
240 sequence data and a minipig genome (minipig\_v1.0, GCA\_000325925.2) that was established from  
241 Illumina short read sequence data were also included for comparison. The numbers of the different  
242 repeat classes and the average mapped lengths of the repetitive elements identified in these four pig  
243 genome assemblies are summarised in Figures S13 and S14, respectively.

244

245 Putative telomeres were identified at the proximal ends of Sscrofa11.1 chromosome assemblies of  
246 SSC2, SSC3, SSC6, SSC8, SSC9, SSC14, SSC15, SSC18 and SSCX (Fig S1; Table S2). Putative centromeres  
247 were identified in the expected locations in the Sscrofa11.1 chromosome assemblies for SSC1-7, SSC9,  
248 SSC13 and SSC18 (Fig S2, Table S3). For the chromosome assemblies of each of SSC8, SSC11 and SSC15  
249 two regions harbouring centromeric repeats were identified. Pig chromosomes SSC1-12 plus SSCX and  
250 SSCY are all metacentric, whilst chromosomes SSC13-18 are acrocentric. The putative centromeric  
251 repeats on SSC17 do not map to the expected end of the chromosome assembly.

252

### 253 Completeness of the assemblies

254 The Sscrofa11.1 and USMARCv1.0 assemblies were assessed for completeness using two tools, BUSCO  
255 (Benchmarking Universal Single-Copy Orthologs) [32] and Cogent  
256 (<https://github.com/Magdoll/Cogent>). BUSCO uses a database of expected gene content based on  
257 near-universal single-copy orthologs from species with genomic data, while Cogent uses  
258 transcriptome data from the organism being sequenced, and therefore provides an organism-specific  
259 view of genome completeness. BUSCO analysis suggests both new assemblies are highly complete,  
260 with 93.8% and 93.1% of BUSCOs complete for Sscrofa11.1 and USMARCv1.0 respectively, a marked  
261 improvement on the 80.9% complete in Sscrofa10.2 and comparable to the human and mouse  
262 reference genome assemblies (Table S6).

263

264 Cogent is a tool that identifies gene families and reconstructs the coding genome using full-length,  
265 high-quality (HQ) transcriptome data without a reference genome and can be used to check  
266 assemblies for the presence of these known coding sequences. PacBio transcriptome (Iso-Seq) data  
267 consisting of high-quality isoform sequences from 7 tissues (diaphragm, hypothalamus, liver, skeletal  
268 muscle (*longissimus dorsi*), small intestine, spleen and thymus) [33] from the pig whose DNA was used  
269 as the source for the USMARCv1.0 assembly were pooled together for Cogent analysis. Cogent  
270 partitioned 276,196 HQ isoform sequences into 30,628 gene families, of which 61% had at least 2  
271 distinct transcript isoforms. Cogent then performed reconstruction on the 18,708 partitions. For each  
272 partition, Cogent attempts to reconstruct coding ‘contigs’ that represent the ordered concatenation  
273 of transcribed exons as supported by the isoform sequences. The reconstructed contigs were then  
274 mapped back to Sscrofa11.1 and contigs that could not be mapped or map to more than one position  
275 are individually examined. There were five genes that were present in the Iso-Seq data, but missing in  
276 the Sscrofa11.1 assembly. In each of these five cases, a Cogent partition (which consists of 2 or more  
277 transcript isoforms of the same gene, often from multiple tissues) exists in which the predicted  
278 transcript does not align back to Sscrofa11.1. NCBI-BLASTN of the isoforms from the partitions  
279 revealed them to have near perfect hits with existing annotations for *CHAMP1*, *ERLIN1*, *IL1RN*, *MB*,  
280 and *PSD4*.

281

282 *ERLIN1* is missing from its predicted location on SSC14 between *CHUK* and *CPN1* gene in Sscrofa11.1.  
283 There is good support for the Sscrofa11.1 assembly in the region from the BAC end sequence  
284 alignments suggesting this area may represent a true haplotype. Indeed, a copy number variant (CNV)  
285 nsv1302227 has been mapped to this location on SSC14 [34] and the *ERLIN1* gene sequences present  
286 in BAC clone CH242-513L2 (ENA: CT868715.3) were incorporated into the earlier Sscrofa10.2  
287 assembly. However, an alternative haplotype containing *ERLIN1* was not found in any of the  
288 assembled contigs from Falcon and this will require further investigation. The *ERLIN1* locus is present  
289 on SSC14 in the USMARCv1.0 assembly (30,107,816-30,143,074; note the USMARCv1.0 assembly of

290 SSC14 is inverted relative to Sscrofa11.1). Of eleven short read pig genome assemblies [17] that have  
291 been annotated with the Ensembl pipeline (Ensembl release 98, September 2019) *ERLIN1* sequences  
292 are present in the expected genomic context in all eleven genome assemblies. As the *ERLIN1* gene is  
293 located at the end of a contig in eight of these short read assemblies, it suggests that this region of  
294 the pig genome presents difficulties for sequencing and assembly and the absence of *ERLIN1* in the  
295 Sscrofa11.1 is more likely to be an assembly error.

296

297 The other 4 genes are annotated in neither Sscrofa10.2 nor Sscrofa11.1. Two of these genes, *IL1RN*  
298 and *PSD4*, are present in the original Falcon contigs, however they were trimmed off during the contig  
299 QC stage because of apparent abnormal Illumina, BAC and fosmid mapping in the region which was  
300 likely caused by the repetitive nature of their expected location on chromosome 3 where a gap is  
301 present. The *IL1RN* and *PSD4* genes are present in the USMARCv1.0, albeit their location is anomalous,  
302 and are also present in the 11 short read assemblies [17]. *CHAMP1* (ENSSSCG00070014091) is present  
303 in the USMARCv1.0 assembly in the sub-telomeric region of the q-arm, after correcting the inversion  
304 of the USMARCv1.0 scaffold and is also present in all 11 short read assemblies [17]. After correcting  
305 the orientation of the USMARCv1.0 chromosome 11 scaffold there is a small inversion of the distal  
306 1.07 Mbp relative to the Sscrofa11.1 assembly; this region harbours the *CHAMP1* gene. The  
307 orientation of the Sscrofa11.1 chromosome 11 assembly in this region is consistent with the  
308 predictions of the human-pig comparative map [35]. The myoglobin gene (*MB*) is present in the  
309 expected location in the USMARCv1.0 assembly flanked by *RASD2* and *RBFOX2*. Partial *MB* sequences  
310 are present distal to *RBFOX2* on chromosome 5 in the Sscrofa11.1 assembly. As there is no gap here  
311 in the Sscrofa11.1 assembly it is likely that the incomplete *MB* is a result of a misassembly in this  
312 region. This interpretation is supported by a break in the pairs of BAC and fosmid end sequences that  
313 map to this region of the Sscrofa11.1 assembly. Some of the expected gene content missing from this  
314 region of the Sscrofa11.1 chromosome 5 assembly, including *RASD2*, *HMOX1* and *LARGE1* is present  
315 on an unplaced scaffold (AEMK02000361.1). Cogent analysis also identified 2 cases of potential

316 fragmentation in the Sscrofa11.1 genome assembly that resulted in the isoforms being mapped to two  
317 separate loci, though these will require further investigation. In summary, the BUSCO and Cogent  
318 analyses indicate that the Sscrofa11.1 assembly captures a very high proportion of the expressed  
319 elements of the genome.

320

### 321 Improved annotation

322 Annotation of Sscrofa11.1 was carried out with the Ensembl annotation pipeline and released via the  
323 Ensembl Genome Browser [36] ([http://www.ensembl.org/Sus\\_scrofa/Info/Index](http://www.ensembl.org/Sus_scrofa/Info/Index)) (Ensembl release  
324 90, August 2017). Statistics for the annotation as updated in June 2019 (Ensembl release 98,  
325 September 2019) are listed in Table 3. This annotation is more complete than that of Sscrofa10.2 and  
326 includes fewer fragmented genes and pseudogenes.

327

328 The annotation pipeline utilised extensive short read RNA-Seq data from 27 tissues and long read  
329 PacBio Iso-Seq data from 9 adult tissues. This provided an unprecedented window into the pig  
330 transcriptome and allowed for not only an improvement to the main gene set, but also the generation  
331 of tissue-specific gene tracks from each tissue sample. The use of Iso-Seq data also improved the  
332 annotation of UTRs, as they represent transcripts sequenced across their full length from the polyA  
333 tract.

334

335 In addition to improved gene models, annotation of the Sscrofa11.1 assembly provides a more  
336 complete view of the porcine transcriptome than annotation of the previous assembly (Sscrofa10.2;  
337 Ensembl releases 67-89, May 2012 – May 2017) with increases in the numbers of transcripts  
338 annotated (Table 3). However, the number of annotated transcripts remains lower than in the human  
339 and mouse genomes. The annotation of the human and mouse genomes and in particular the gene  
340 content and encoded transcripts has been more thorough as a result of extensive manual annotation.

341

342 Efforts were made to annotate important classes of genes, in particular immunoglobulins and  
343 olfactory receptors. For these genes, sequences were downloaded from specialist databases and the  
344 literature in order to capture as much detail as possible (see supplementary information for more  
345 details).

346

347 These improvements in terms of the resulting annotation were evident in the results of the  
348 comparative genomics analyses run on the gene set. The previous annotation had 12,919 one-to-one  
349 orthologs with human, while the new annotation of the Sscrofa11.1 assembly has 15,544. Similarly, in  
350 terms of conservation of synteny, the previous annotation had 11,661 genes with high confidence  
351 gene order conservation scores, while the new annotation has 15,958. There was also a large  
352 reduction in terms of genes that were either abnormally short or split when compared to their  
353 orthologs in the new annotation.

354

355 The Sscrofa11.1 assembly has also been annotated using the NCBI pipeline  
356 ([https://www.ncbi.nlm.nih.gov/genome/annotation\\_euk/Sus\\_scrofa/106/](https://www.ncbi.nlm.nih.gov/genome/annotation_euk/Sus_scrofa/106/)). We have compared  
357 these two annotations. The Ensembl and NCBI annotations of Sscrofa11.1 are broadly similar (Table  
358 S7). There are 17,676 protein coding genes and 1,700 non-coding genes in common. However, 540 of  
359 the genes annotated as protein-coding by Ensembl are annotated as non-coding or pseudogenes by  
360 NCBI and 227 genes annotated as non-coding by NCBI are annotated as protein-coding (215) or as  
361 pseudogenes (12) by Ensembl. The NCBI RefSeq annotation can be visualised in the Ensembl Genome  
362 Browser by loading the RefSeq GFF3 track and the annotations compared at the individual locus level.  
363 Similarly, the Ensembl annotated genes can be visualised in the NCBI Genome Browser. Despite  
364 considerable investment there are also differences in the Ensembl and NCBI annotation of the human  
365 reference genome sequence with 20,444 and 19,755 protein-coding genes on the primary assembly,  
366 respectively. The MANE (Matched Annotation from NCBI and EMBL-EBI) project was launched to  
367 resolve these differences and identify a matched representative transcript for each human protein-



368 coding gene (<https://www.ensembl.org/info/genome/genebuild/mane.html>). To date a MANE  
369 transcript has been identified for 12,985 genes.

370

371 We have also annotated the USMARCv1.0 assembly using the Ensembl pipeline [36] and this  
372 annotation was released via the Ensembl Genome Browser  
373 ([https://www.ensembl.org/Sus\\_scrofa\\_usmarc/Info/Index](https://www.ensembl.org/Sus_scrofa_usmarc/Info/Index)) (Ensembl release 97, July 2019; see Table  
374 3 for summary statistics). More recently, we have annotated a further eleven short read pig genome  
375 assemblies [17] (Ensembl release 98, September 2019, see Tables S5c and S10 for summary statistics  
376 for the assemblies and annotation, respectively).

377

#### 378 SNP chip probes mapped to assemblies

379 The probes from four commercial SNP chips were mapped to the Sscrofa10.2, Sscrofa11.1 and  
380 USMARCv1.0 assemblies. We identified 1,709, 56, and 224 markers on the PorcineSNP60, GGP LD and  
381 80K commercial chips that were previously unmapped and now have coordinates on the Sscrofa11.1  
382 reference (Table S8). These newly mapped markers can now be imputed into a cross-platform,  
383 common set of SNP markers for use in genomic selection. Additionally, we have identified areas of the  
384 genome that are poorly tracked by the current set of commercial SNP markers. The previous  
385 Sscrofa10.2 reference had an average marker spacing of 3.57 kbp (Stdev: 26.5 kb) with markers from  
386 four commercial genotyping arrays. We found this to be an underestimate of the actual distance  
387 between markers, as the Sscrofa11.1 reference coordinates consisted of an average of 3.91 kbp  
388 (Stdev: 14.9 kbp) between the same set of markers. We also found a region of 2.56 Mbp that is  
389 currently devoid of suitable markers on the new reference.

390

391 A Spearman's rank order ( $\rho$ ) value was calculated for each assembly (alternative hypothesis:  $\rho$  is  
392 equal to zero;  $p < 2.2 \times 10^{-16}$ ): Sscrofa10.2: 0.88464; Sscrofa11.1: 0.88890; USMARCv1.0: 0.81260. This  
393 rank order comparison was estimated by ordering all of the SNP probes from all chips by their listed

394 manifest coordinates against their relative order in each assembly (with chromosomes ordered by  
395 karyotype). Any unmapped markers in an assembly were penalized by giving the marker a "-1" rank in  
396 the assembly ranking order.

397

398 In order to examine general linear order of placed markers on each assembly, the marker rank order  
399 (y axis; used above in the Spearman's rank order test) was plotted against the rank order of the probe  
400 rank order on the manifest file (x axis) (Fig. S15). The analyses revealed some interesting artefacts that  
401 suggest that the SNP manifest coordinates for the porcine 60K SNP chip are still derived from an  
402 obsolete (Sscrofa9) reference in contrast to all other manifests (Sscrofa10.2). Also, it confirms that  
403 several of the USMARCv1.0 chromosome scaffolds are inverted with respect to the canonical  
404 orientation of pig chromosomes. The large band of points at the top of the plot corresponds to marker  
405 mappings on the unplaced contigs of each assembly. These unplaced contigs often correspond to  
406 assemblies of alternative haplotypes in heterozygous regions of the reference animal [24]. Marker  
407 placement on these segments suggests that these variants are tracking different haplotypes in the  
408 population, which is the desired intent of genetic markers used in Genomic Selection.

409

## 410 Discussion

411 We have assembled a superior, extremely continuous reference assembly (Sscrofa11.1) by leveraging  
412 the excellent contig lengths provided by long reads, and a wealth of available data including Illumina  
413 paired-end, BAC end sequence, finished BAC sequence, fosmid end sequences, and the earlier curated  
414 draft assembly (Sscrofa10.2). The pig genome assemblies USMARCv1.0 and Sscrofa11.1 reported here  
415 are 92-fold to 694-fold respectively, more continuous than the published draft reference genome  
416 sequence (Sscrofa10.2) [13]. The new pig reference genome assembly (Sscrofa11.1) with its contig  
417 N50 of 48,231,277 bp and 506 gaps compares favourably with the current human reference genome  
418 sequence (GRCh38.p12) that has a contig N50 of 57,879,411 bp and 875 gaps (Table 1). Indeed,  
419 considering only the chromosome assemblies built on PacBio long read data (i.e. Sscrofa11 - the  
420 autosomes SSC1-SSC18 plus SSCX), there are fewer gaps in the pig assembly than in human reference  
421 autosomes and HSAX assemblies. Most of the gaps in the Sscrofa11.1 reference assembly are  
422 attributed to the fragmented assembly of SSCY. The capturing of centromeres and telomeres for  
423 several chromosomes (Tables S2, S3; Figs. S1, S2) provides further evidence that the Sscrofa11.1  
424 assembly is more complete. The increased contiguity of Sscrofa11.1 is evident in the graphical  
425 comparison to Sscrofa10.2 illustrated in Figure 2.

426

427 The improvements in the reference genome sequence (Sscrofa11.1) relative to the draft assembly  
428 (Sscrofa10.2) [13] are not restricted to greater continuity and fewer gaps. The major flaws in the BAC  
429 clone-based draft assembly were i) failures to resolve the sequence redundancy amongst sequence  
430 contigs within BAC clones and between adjacent overlapping BAC clones and ii) failures to accurately  
431 order and orient the sequence contigs within BAC clones. Although the Sanger sequencing technology  
432 used has a much lower raw error rate than the PacBio technology, the sequence coverage was only 4-  
433 6 fold across the genome. The improvements in continuity and quality (Table 2; Figs. S5 to S7) have  
434 yielded a better template for annotation resulting in better gene models. The Sscrofa11.1 and  
435 USMARCv1.0 assemblies are classed as 4|4|1 and 3|5|1 [ $10^X$ : N50 contig (kb);  $10^Y$ : N50 scaffold (kb);

436 Z = 1|0: assembled to chromosome level] respectively compared to Sscrofa10.2 as 1|2|1 and the  
437 human GRCh38p5 assembly as 4|4|1 (see <https://geval.sanger.ac.uk>).

438

439 The improvement in the complete BUSCO (Benchmarking Universal Single-Copy Orthologs) genes  
440 indicates that both Sscrofa11.1 and USMARCv1.0 represent superior templates for annotation of gene  
441 models than the draft Sscrofa10.2 assembly and are comparable to the finished human and mouse  
442 reference genome sequences (Table S6). Further, a companion bioinformatics analysis of available Iso-  
443 seq and companion Illumina RNA-seq data across the nine tissues surveyed has identified a large  
444 number (>54,000) of novel transcripts [33]. A majority of these transcripts are predicted to be spliced  
445 and validated by RNA-seq data. Beiki and colleagues identified 10,465 genes expressing Iso-seq  
446 transcripts that are present on the Sscrofa11.1 assembly, but which are unannotated in current NCBI  
447 or Ensembl annotations.

448

449 Whilst the alignment of the Sscrofa11.1 and USMARCv1.0 assemblies revealed that several of the  
450 USMARCv1.0 chromosome assemblies are inverted relative to Sscrofa11.1 and the cytogenetic map.  
451 Such inversions are due to the agnostic nature of genome assembly and post-assembly polishing  
452 programs. Unless these are corrected post-hoc by manual curation, they result in artefactual  
453 inversions of the entire chromosome. However, such inversions do not generally impact downstream  
454 analysis that does not involve the relative order/orientation of whole chromosomes.

455

456 Whether the differences between Sscrofa11.1 and USMARCv1.0 in order and orientation within  
457 chromosomes represent assembly errors or real chromosomal differences will require further  
458 research. The sequence present at the telomeric end of the long arm of the USMARCv1.0 chromosome  
459 7 assembly (after correcting the orientation of the USMARCv1.0 SSC7) is missing from the Sscrofa11.1  
460 SSC7 assembly, and currently located on a 3.8 Mbp unplaced scaffold (AEMK02000452.1). This  
461 unplaced scaffold harbours several genes including *DIO3*, *CKB* and *NUDT14* whose orthologues map

462 to human chromosome 14 as would be predicted from the pig-human comparative map [35]. This  
463 omission will be corrected in an updated assembly in future.

464

465 We demonstrate moderate improvements in the placement and ordering of commercial SNP  
466 genotyping markers on the Sscrofa11.1 reference genome which will impact future genomic selection  
467 programs. The reference-derived order of SNP markers plays a significant role in imputation accuracy,  
468 as demonstrated by a whole-genome survey of misassembled regions in cattle that found a correlation  
469 between imputation errors and misassemblies [37]. The gaps in SNP chip marker coverage that we  
470 identified will inform future marker selection surveys, which are likely to prioritize regions of the  
471 genome that are not currently being tracked by marker variants in close proximity to potential causal  
472 variant sites. In addition to the gaps in coverage provided by the commercial SNP chips there are  
473 regions of the genome assemblies that are devoid of annotated sequence variation as hitherto  
474 sequence variants have been discovered against incomplete genome assemblies. Thus, there is a need  
475 to re-analyse good quality re-sequence data against the new assemblies in order to provide a better  
476 picture of sequence variation in the pig genome.

477

478 The cost of high coverage whole-genome sequencing (WGS) precludes it from routine use in breeding  
479 programs. However, it has been suggested that low coverage WGS followed by imputation of  
480 haplotypes may be a cost-effective replacement for SNP arrays in genomic selection [38]. Imputation  
481 from low coverage sequence data to whole genome information has been shown to be highly accurate  
482 [39, 40]. At the 2018 World Congress on Genetics Applied to Livestock Production Aniek Bouwman  
483 reported that in a comparison of Sscrofa10.2 with Sscrofa11.1 (for SSC7 only) for imputation from  
484 600K SNP genotypes to whole genome sequence overall imputation accuracy on SSC7 improved  
485 considerably from 0.81 (1,019,754 variants) to 0.90 (1,129,045 variants) (Aniek Bouwman, pers.  
486 comm). Thus, the improved assembly may not only serve as a better template for discovering genetic  
487 variation but also have advantages for genomic selection, including improved imputation accuracy.

488

489 Advances in the performance of long read sequencing and scaffolding technologies, improvements in  
490 methods for assembling the sequence reads and reductions in costs are enabling the acquisition of  
491 ever more complete genome sequences for multiple species and multiple individuals within a species.  
492 For example, in terms of adding species, the Vertebrate Genomes Project  
493 (<https://vertebrategenomesproject.org/>) aims to generate error-free, near gapless, chromosomal  
494 level, haplotyped phase assemblies of all of the approximately 66,000 vertebrate species and is  
495 currently in its first phase that will see such assemblies created for an exemplar species from all 260  
496 vertebrate orders. At the level of individuals within a species, smarter assembly algorithms and  
497 sequencing strategies are enabling the production of high quality truly haploid genome sequences for  
498 outbred individuals [24]. The establishment of assembled genome sequences for key individuals in the  
499 nucleus populations of the leading pig breeding companies is achievable and potentially affordable.  
500 However, 10-30x genome coverage short read data generated on the Illumina platform and aligned to  
501 a single reference genome is likely to remain the primary approach to sequencing multiple individuals  
502 within farmed animal species such as cattle and pigs [21, 41].

503

504 There are significant challenges in making multiple assembled genome resources useful and  
505 accessible. The current paradigm of presenting a reference genome as a linear representation of a  
506 haploid genome of a single individual is an inadequate reference for a species. As an interim solution  
507 the Ensembl team are annotating multiple assemblies for some species such as mouse  
508 ([https://www.ensembl.org/Mus\\_musculus/Info/Strains](https://www.ensembl.org/Mus_musculus/Info/Strains)) [42]. We have implemented this solution for  
509 pig genomes, including eleven Illumina short-read assemblies [17] in addition to the reference  
510 Sscrofa11.1 and USMARCv1.0 assemblies reported here (Ensembl release 98, September 2019  
511 [https://www.ensembl.org/Sus\\_scrofa/Info/Strains?db=core](https://www.ensembl.org/Sus_scrofa/Info/Strains?db=core)). Although these additional pig genomes  
512 are highly fragmented (Table S5c) with contig N50 values from 32 – 102 kbp, the genome annotation  
513 (Table S10) provides a resource to explore pig gene space across thirteen genomes, including six Asian

514 pig genomes. The latter are important given the deep phylogenetic split of about 1 million years  
515 between European and Asian pigs [13].

516

517 The current human genome reference already contains several hundred alternative haplotypes and it  
518 is expected that the single linear reference genome of a species will be replaced with a new model –  
519 the graph genome [43-45]. These paradigm shifts in the representation of genomes present challenges  
520 for current sequence alignment tools and the ‘best-in-genome’ annotations generated thus far. The  
521 generation of high quality annotation remains a labour-intensive and time-consuming enterprise.  
522 Comparisons with the human and mouse reference genome sequences which have benefited from  
523 extensive manual annotation indicate that there is further complexity in the porcine genome as yet  
524 unannotated (Table 3). It is very likely that there are many more transcripts, pseudogenes and non-  
525 coding genes (especially long non-coding genes), to be discovered and annotated on the pig genome  
526 sequence [33]. The more highly continuous pig genome sequences reported here provide an improved  
527 framework against which to discover functional sequences, both coding and regulatory, and sequence  
528 variation. After correction for some contig/scaffold inversions in the USMARCv1.0 assembly, the  
529 overall agreement between the assemblies is high and illustrates that the majority of genomic  
530 variation is at smaller scales of structural variation. However, both assemblies still represent a  
531 composite of the two parental genomes present in the animals, with unknown effects of haplotype  
532 switching on the local accuracy across the assembly.

533

534 Future developments in high quality genome sequences for the domestic pig are likely to include: (i)  
535 gap closure of Sscrofa11.1 to yield an assembly with one contig per (autosomal) chromosome arm  
536 exploiting the isogenic BAC and fosmid clone resource as illustrated here for chromosome 16 and 18;  
537 and (ii) haplotype resolved assemblies of a Meishan and White Composite F1 crossbred pig currently  
538 being sequenced. Beyond this haplotype resolved assemblies for key genotypes in the leading pig  
539 breeding company nucleus populations and of miniature pig lines used in biomedical research can be

540 anticipated in the next 5 years. Unfortunately, some of these genomes may not be released into the  
541 public domain. The first wave of results from the Functional Annotation of ANimal Genomes (FAANG)  
542 initiative [46, 47], are emerging and will add to the richness of pig genome annotation.

543

544 In conclusion, the new pig reference genome (Sscrofa11.1) described here represents a significantly  
545 enhanced resource for genetics and genomics research and applications for a species of importance  
546 to agriculture and biomedical research.

547



548 **Methods**

549 Additional detailed methods and information on the assemblies and annotation are included in the  
550 Supplementary Materials.

551

552 Preparation of genomic DNA

553 DNA was extracted from Duroc 2-14 cultured fibroblast cells passage 16-18 using the Qiagen Blood &  
554 Cell Culture DNA Maxi Kit. DNA was isolated from lung tissue from barrow MARC1423004 using a salt  
555 extraction method.

556

557 Genome sequencing and assembly

558 Genomic DNAs from the samples described above were used to prepare libraries for sequencing on  
559 Pacific Biosciences RS II sequencer [48]. For Duroc 2-14 DNA P6/C4 chemistry was used, whilst for  
560 MARC1423004 DNA a mix of P6/C4 and earlier P5/C3 chemistry was used.

561

562 Reads from the Duroc 2-14 DNA were assembled into contigs using the Falcon v0.4.0 assembly pipeline  
563 following the standard protocol [26]. Quiver v. 2.3.0 [49] was used to correct the primary and  
564 alternative contigs. Only the primary pseudo-haplotype contigs were used in the assembly. The reads  
565 from the MARC1423004 DNA were assembled into contigs using Celera Assembler v8.3rc2 [30]. The  
566 contigs were scaffolded as described in the results section above.

567

568 Fluorescence *in situ* hybridisation

569 Metaphase preparations were fixed to slides and dehydrated through an ethanol series (2 min each  
570 in 2×SSC, 70%, 85% and 100% ethanol at RT). Probes were diluted in a formamide buffer (Cytocell)  
571 with Porcine Hybloc (Insight Biotech) and applied to the metaphase preparations on a 37°C hotplate  
572 before sealing with rubber cement. Probe and target DNA were simultaneously denatured for 2 mins  
573 on a 75°C hotplate prior to hybridisation in a humidified chamber at 37°C for 16 h. Slides were washed

574 post hybridisation in 0.4x SSC at 72°C for 2 mins followed by 2x SSC/0.05% Tween 20 at RT for 30 secs,  
575 and then counterstained using VECTASHIELD anti-fade medium with DAPI (Vector Labs). Images were  
576 captured using an Olympus BX61 epifluorescence microscope with cooled CCD camera and  
577 SmartCapture (Digital Scientific UK) system.

578

#### 579 Analysis of repetitive sequences, including telomeres and centromeres

580 Repeats were identified using RepeatMasker (v.4.0.7) (<http://www.repeatmasker.org>) with a  
581 combined repeat database including Dfam (v.20170127) [50] and RepBase (v.20170127) [51].  
582 RepeatMasker was run with “sensitive” (-s) setting using *sus scrofa* as the query species (-- species  
583 “*sus scrofa*”). Repeats which showed greater than 40% sequence divergence or were shorter than 70%  
584 of the expected sequence length were filtered out from subsequent analyses. The presence of  
585 potentially novel repeats was assessed by RepeatMasker using the novel repeat library generated by  
586 RepeatModeler (v.1.0.11) (<http://www.repeatmasker.org>).

587

588 Telomeres were identified by running Tandem Repeat Finder (TRF) [52] with default parameters apart  
589 from Mismatch (5) and Minscore (40). The identified repeat sequences were then searched for the  
590 occurrence of five identical, consecutive units of the TTAGGG vertebrate motif or its reverse  
591 complement and total occurrences of this motif was counted within the tandem repeat. Regions which  
592 contained at least 200 identical hexamer units, were >2kb of length and had a hexamer density of >0.5  
593 were retained as potential telomeres.

594

595 Centromeres were predicted using the following strategy. First, the RepeatMasker output, both  
596 default and novel, was searched for centromeric repeat occurrences. Second, the assemblies were  
597 searched for known, experimentally verified, centromere specific repeats [53, 54] in the *Sscrofa11.1*  
598 genome. Then the three sets of repeat annotations were merged together with BEDTools [55] (median  
599 and mean length: 786 bp and 5775 bp, respectively) and putative centromeric regions closer than

600 500 bp were collapsed into longer super-regions. Regions which were >5kb were retained as potential  
601 centromeric sites.

602

603 Long read RNA sequencing (Iso-Seq)

604 The following tissues were harvested from MARC1423004 at age 48 days: brain (BioSamples:  
605 SAMN05952594), diaphragm (SAMN05952614), hypothalamus (SAMN05952595), liver  
606 (SAMN05952612), small intestine (SAMN05952615), skeletal muscle – *longissimus dorsi*  
607 (SAMN05952593), spleen (SAMN05952596), pituitary (SAMN05952626) and thymus  
608 (SAMN05952613). Total RNA from each of these tissues was extracted using Trizol reagent  
609 (ThermoFisher Scientific) and the provided protocol. Briefly, approximately 100 mg of tissue was  
610 ground in a mortar and pestle cooled with liquid nitrogen, and the powder was transferred to a tube  
611 with 1 ml of Trizol reagent added and mixed by vortexing. After 5 minutes at room temperature,  
612 0.2 mL of chloroform was added and the mixture was shaken for 15 seconds and left to stand another  
613 3 minutes at room temperature. The tube was centrifuged at 12,000 x g for 15 minutes at 4°C. The  
614 RNA was precipitated from the aqueous phase with 0.5 mL of isopropanol. The RNA was further  
615 purified with extended DNase I digestion to remove potential DNA contamination. The RNA quality  
616 was assessed with a Fragment Analyzer (Advanced Analytical Technologies Inc., IA). Only RNA samples  
617 of RQN above 7.0 were used for library construction. PacBio IsoSeq libraries were constructed per the  
618 PacBio IsoSeq protocol. Briefly, starting with 3 µg of total RNA, cDNA was synthesized by using  
619 SMARTer PCR cDNA Synthesis Kit (Clontech, CA) according to the IsoSeq protocol (Pacific Biosciences,  
620 CA). Then the cDNA was amplified using KAPA HiFi DNA Polymerase (KAPA Biotechnologies) for 10 or  
621 12 cycles followed by purification and size selection into 4 fractions: 0.8-2 kb, 2-3 kb, 3-5 kb and >5 kb.  
622 The fragment size distribution was validated on a Fragment Analyzer (Advanced Analytical  
623 Technologies Inc, IA) and quantified on a DS-11 FX fluorometer (DeNovix, DE). After a second round  
624 of large scale PCR amplification and end repair, SMRT bell adapters were separately ligated to the  
625 cDNA fragments. Each size fraction was sequenced on 4 or 5 SMRT Cells v3 using P6-C4 chemistry and

626 6 hour movies on a PacBio RS II sequencer (Pacific Bioscience, CA). Short read RNA-Seq libraries were  
627 also prepared for all nine tissue using TruSeq stranded mRNA LT kits and supplied protocol (Illumina,  
628 CA), and sequenced on a NextSeq500 platform using v2 sequencing chemistry to generate 2 x 75 bp  
629 paired-end reads.

630

631 The Read of Insert (ROI) were determined by using *consensustools.sh* in the SMRT-Analysis pipeline  
632 v2.0, with reads which were shorter than 300 bp and whose predicted accuracy was lower than 75%  
633 removed. Full-length, non-concatemer (FLNC) reads were identified by running the *classify.py*  
634 command. The cDNA primer sequences as well as the poly(A) tails were trimmed prior to further  
635 analysis. Paired-end Illumina RNA-Seq reads from each tissue sample were trimmed to remove the  
636 adaptor sequences and low-quality bases using Trimmomatic (v0.32) [56] with explicit option settings:  
637 *ILLUMINACLIP:adapters.fa:2:30:10:1:true LEADING:3 TRAILING:3 SLIDINGWINDOW:4:20 LEADING:3*  
638 *TRAILING:3 MINLEN:25*, and overlapping paired-end reads were merged using the PEAR software  
639 (v0.9.6) [57]. Subsequently, the merged and unmerged RNA-Seq reads from the same tissue samples  
640 were *in silico* normalized in a mode for single-end reads by using a Trinity (v2.1.1) [58] utility,  
641 *insilico\_read\_normalization.pl*, with the following settings: *--max\_cov 50 --max\_pct\_stdev 100 --*  
642 *single*. Errors in the full-length, non-concatemer reads were corrected with the preprocessed RNA-Seq  
643 reads from the same tissue samples by using *proofread* (v2.12) [59]. Untrimmed sequences with at  
644 least some regions of high accuracy in the *.trimmed.fq* files were extracted based on sequence IDs in  
645 *.untrimmed.fa* files to balance off the contiguity and accuracy of the final reads.

646

#### 647 Short read RNA sequencing (RNA-Seq)

648 In addition to the Illumina short read RNA-seq data generated from MARC1423004 and used to correct  
649 the Iso-Seq data (see above), Illumina short read RNA-seq data (PRJEB19386) were also generated  
650 from a range of tissues from four juvenile Duroc pigs (two male, two female) and used for annotation  
651 as described below. Extensive metadata with links to the protocols for sample collection and

652 processing are linked to the BioSample entries under the Study Accession PRJEB19386. The tissues  
653 sampled are listed in Table S9. Sequencing libraries were prepared using a ribodepletion TruSeq  
654 stranded RNA protocol and 150 bp paired end sequences generated on the Illumina HiSeq 2500  
655 platform in rapid mode.

656

#### 657 Annotation

658 The assembled genomes were annotated using the Ensembl pipelines [36] as detailed in the  
659 Supplementary materials. The Iso-Seq and RNA-Seq data described above were used to build gene  
660 models.

661

#### 662 Mapping SNP chip probes

663 The probes from four commercial SNP chips were mapped to the Sscrofa10.2, Sscrofa11.1 and  
664 USMARCv1.0 assemblies using BWA MEM [60] and a wrapper script  
665 ([https://github.com/njdbickhart/perl\\_toolchain/blob/master/assembly\\_scripts/alignAndOrderSnpPr](https://github.com/njdbickhart/perl_toolchain/blob/master/assembly_scripts/alignAndOrderSnpPr)  
666 [obes.pl](https://github.com/njdbickhart/perl_toolchain/blob/master/assembly_scripts/alignAndOrderSnpPr_obes.pl)). Probe sequence was derived from the marker manifest files that are available on the provider  
667 websites: Illumina PorcineSNP60 ([https://emea.illumina.com/products/by-type/microarray-](https://emea.illumina.com/products/by-type/microarray-kits/porcine-snp60.html)  
668 [kits/porcine-snp60.html](https://emea.illumina.com/products/by-type/microarray-kits/porcine-snp60.html)) [1]; Affymetrix Axiom™ Porcine Genotyping Array  
669 (<https://www.thermofisher.com/order/catalog/product/550588>); Gene Seek Genomic Profiler  
670 Porcine – HD beadChip (<http://genomics.neogen.com/uk/ggp-porcine>); Gene Seek Genomic Profiler  
671 Porcine v2– LD Chip (<http://genomics.neogen.com/uk/ggp-porcine>). In order to retain marker  
672 manifest coordinate information, each probe marker name was annotated with the chromosome and  
673 position of the marker’s variant site from the manifest file. All mapping coordinates were tabulated  
674 into a single file, and were sorted by the chromosome and position of the manifest marker site. In  
675 order to derive and compare relative marker rank order, a custom Perl script  
676 ([https://github.com/njdbickhart/perl\\_toolchain/blob/master/assembly\\_scripts/pigGenomeSNPSortR](https://github.com/njdbickhart/perl_toolchain/blob/master/assembly_scripts/pigGenomeSNPSortR)

677 [ankOrder.pl](#)) was used to sort and number markers based on their mapping locations in each

678 assembly.

679

680 **Supplementary materials**

681 Supplementary materials for this article include:

682 Supplementary Methods and Information

683 Table S1. Pacific Biosciences read statistics.

684 Table S2. Predicted telomeres.

685 Table S3. Predicted centromeres.

686 Table S4. Assigning scaffolds to chromosomes.

687 Table S5. Assemblytics comparisons.

688 Table S6. BUSCO results.

689 Table S7. Annotation statistics. (Ensembl-NCBI comparison)

690 Table S8. Commercial SNP chip probes.

691 Table S9. Tissue samples.

692 Table S10. Ensembl annotation statistics for 13 pig genome assemblies

693 Figure S1. Predicted telomeres.

694 Figure S2. Predicted centromeres.

695 Figure S3. Fluorescent *in situ* hybridisation assignments.

696 Fig. S4. Improvement in local order and orientation and reduction in redundancy.

697 Fig. S5. Assembly comparisons in gEVAL (SSC15).

698 Fig. S6. Assembly comparisons in gEVAL (SSC5).

699 Fig. S7. Assembly comparisons in gEVAL (SSC18).

700 Fig. S8. Order and orientation of SSC18 assemblies.

701 Fig. S9. Order and orientation of SSC7 assemblies.

702 Fig. S10. Order and orientation of SSC8 assemblies.

703 Fig. S11. Assembly alignments.

704 Figure S12. Assemblytics results.

705 Figure S13. Counts of repetitive elements in four pig assemblies.

706 Figure S14. Average mapped length of repetitive elements in four pig genomes.

707 Figure S15. Assembly SNP rank concordance versus reported chromosomal location.

708



709 **References**

- 710 1. Ramos AM, Crooijmans RPMA, Affara NA, Amaral AJ, Archibald AL, Beever JE, et al. Design of a  
711 high density SNP genotyping assay in the pig using SNPs identified and characterized by next  
712 generation sequencing technology. *PLoS One* 2009;4:e6524.
- 713 2. Hu ZL, Park CA, ReecyJM, Developmental progress and current status of the Animal QTLdb. *Nucleic*  
714 *Acids Res.* 2016;44:D827–33.
- 715 3. Meuwissen T, Hayes, B, Goddard M, Accelerating Improvement of Livestock with Genomic  
716 Selection. *Annu. Rev. Anim. Biosci.* 2013;1:221–37.
- 717 4. Christensen OF, Madsen P, Nielsen B, Ostersen T, Su G, Single-step methods for genomic  
718 evaluation in pigs. *Animal* 2012;6:1565–71.
- 719 5. Cleveland M, Hickey JM, Practical implementation of cost-effective genomic selection in  
720 commercial pig breeding using imputation. *J. Anim. Sci.* 2013;91:3583–92.
- 721 6. Vamathevan JJ, Hall MD, Hasan S, Woollard PM, Xu M, Yang Y, et al. Minipig and beagle animal  
722 model genomes aid species selection in pharmaceutical discovery and development. *Toxicol. Appl.*  
723 *Pharmacol.* 2013;270:149–57.
- 724 7. Klymiuk N, Seeliger F, Bohlooly M, Blutke A, Rudmann DG, Wolf E, Tailored Pig Models for  
725 Preclinical Efficacy and Safety Testing of Targeted Therapies. *Toxicol. Pathol.* 2016;44:346–57.
- 726 8. Wells KD, Prather RS, Genome-editing technologies to improve research, reproduction, and  
727 production in pigs. *Mol. Reprod. Dev.* 2017;84:1012–7.
- 728 9. Servin B, Faraut T, Iannuccelli N, Zelenika D, Milan D, High-resolution autosomal radiation hybrid  
729 maps of the pig genome and their contribution to the genome sequence assembly. *BMC Genomics*  
730 2012;13:585.
- 731 10. Tortereau F, Servin B, Frantz L, Megens HJ, Milan D, Rohrer G, et al. A high density recombination  
732 map of the pig reveals a correlation between sex-specific recombination and GC content. *BMC*  
733 *Genomics* 2012;13:586.

- 734 11. Yerle M, Lahbib-Mansais Y, Mellink C, Goureau A, Pinton P, Echard G, et al. The PiGMap  
735 consortium cytogenetic map of the domestic pig (*Sus scrofa domestica*). *Mamm. Genome*  
736 1995;6:176–86.
- 737 12. Humphray SJ, Scott CE, Clark R, Marron B, Bender C, Camm N, et al. A high utility integrated map  
738 of the pig genome. *Genome Biol.* 2017;8:R139.
- 739 13. Groenen MAM, Archibald AL, Uenishi H, Tuggle CK, Takeuchi Y, Rothschild MF, et al. Analyses of  
740 pig genomes provide insight into porcine demography and evolution. *Nature* 2012;491:393–8.
- 741 14. Warr A, Robert C, Hume D, Archibald AL, Deeb N, Watson M. Identification of Low-Confidence  
742 Regions in the Pig Reference Genome (*Sscrofa* 10.2). *Front. Genet.* 2015;6:338.
- 743 15. O’Connor RE, Fonseka G, Frodsham R, Archibald AL, Lawrie M, Walling GA et al. Isolation of  
744 subtelomeric sequences of porcine chromosomes for translocation screening reveals errors in the  
745 pig genome assembly. *Anim. Genet.* 2017;48:395–403.
- 746 16. Dawson HD, Chen C, Gaynor B, Shao J, Urban Jr. JF. The porcine translational research database:  
747 a manually curated, genomics and proteomics-based research resource. *BMC Genomics*  
748 2017;18:643.
- 749 17. Li M, Chen L, Tian S, Lin Y, Tang Q, Zhou X, et al. Comprehensive variation discovery and recovery  
750 of missing sequence in the pig genome using multiple de novo assemblies. *Genome Res.*  
751 2017;27:865–74.
- 752 18. Schook LB, Beever JE, Rogers J, Humphray S, Archibald A, Chardon P, et al. Swine Genome  
753 Sequencing Consortium (SGSC): A strategic roadmap for sequencing the pig genome. *Comparative*  
754 *and Functional Genomics* 2005;6:251–5.
- 755 19. Robert C, Fuentes-Utrilla P, Troup K, Loecherbach J, Turner F, Talbot R, et al. Design and  
756 development of exome capture sequencing for the domestic pig (*Sus scrofa*). *BMC Genomics*  
757 2014;15:550.
- 758 20. Skinner BM, Sargent CA, Churcher C, Hunt T, Herrero J, Loveland JE, et al. The pig X and Y  
759 Chromosomes: structure, sequence, and evolution. *Genome Res.* 2016;26:130–9.

- 760 21. Frantz LAF, Schraiber JG, Madsen O, Megens HJ, Cagan A, Bosse M, et al. Evidence of long-term  
761 gene flow and selection during domestication from analyses of Eurasian wild and domestic pig  
762 genomes. *Nat. Genet.* 2015;47:1141-8.
- 763 22. Groenen MAM. A decade of pig genome sequencing: a window on pig domestication and  
764 evolution. *Genet. Sel. Evol.* 2016;48:23.
- 765 23. van Dijk EL, Jaszczyszyn Y, Naquin D, Thermes C. The Third Revolution in Sequencing Technology.  
766 *Trends in Genetics* 2018;34:666-81.
- 767 24. Koren S, Rhie A, Walenz BP, Dilthey AT, Bickhart DM, Kingan SB, et al. De novo assembly of  
768 haplotype-resolved genomes with trio binning. *Nat. Biotechnol.* 2018;36:1174-82.
- 769 25. Putnam NH, O'Connell BL, Stites JC, Rice BJ, Blanchette M, Calef R, et al. Chromosome-scale  
770 shotgun assembly using an in vitro method for long-range linkage. *Genome Res.* 2016;26:342–50.
- 771 26. Chin CS, Peluso P, Sedlazeck FJ, Nattestad M, Concepcion GT, Clum A, et al. Phased diploid genome  
772 assembly with single-molecule real-time sequencing. *Nat. Methods* 2016;13:1050–4.
- 773 27. Kurtz S, Phillippy A, Delcher AL, Smoot M, Shumway M, Antonescu C, et al. Versatile and open  
774 software for comparing large genomes. *Genome Biol.* 2004;5:R12.
- 775 28. English AC, Richards S, Han Y, Wang M, Lee V, Qu J, et al. Mind the Gap: Upgrading Genomes with  
776 Pacific Biosciences RS Long-Read Sequencing Technology. *PLoS One* 2012;7:e47768.
- 777 29. Chow W, Brugger K, Caccamo M, Sealy I, Torrance J, Howe K. gEVAL-a web-based browser for  
778 evaluating genome assemblies. *Bioinformatics* 2016;32:2508–10.
- 779 30. Berlin K, Koren S, Chin CS, Drake JP, Landolin JM, Phillippy AM. Assembling large genomes with  
780 single-molecule sequencing and locality-sensitive hashing. *Nat. Biotechnol.* 2015;33:623–30.
- 781 31. Nattestad M, Schatz MC. Assemblytics: A web analytics tool for the detection of variants from an  
782 assembly. *Bioinformatics* 2016;32:3021-3.
- 783 32. Simão FA, Waterhouse RM, Ioannidis P, Kriventseva EV, Zdobnov EM. BUSCO: Assessing genome  
784 assembly and annotation completeness with single-copy orthologs. *Bioinformatics* 2015;31:3210–  
785 2.

- 786 33. Beiki H, Liu H, Manchanda N, Nonneman D, Smith TPL, Reecy JM et al. Improved annotation of the  
787 domestic pig genome through integration of Iso-Seq and RNA-seq data. *BMC Genomics*  
788 2019;20:344.
- 789 34. Long Y, Su Y, Ai H, Zhang Z, Yang B, Ruan G, et al. A genome-wide association study of copy number  
790 variations with umbilical hernia in swine. *Anim. Genet.* 2016;47:298–305.
- 791 35. Meyers SN, Rogatcheva MB, Larkin DM, Yerle M, Milan D, Hawken RJ, et al. Piggy-BACing the  
792 human genome: II. A high-resolution, physically anchored, comparative map of the porcine  
793 autosomes. *Genomics* 2005;86:739-52.
- 794 36. Cunningham F, Achuthan P, Akanni W, Allen J, Amode MR, Armean IM, et al. Ensembl 2019.  
795 *Nucleic Acids Res.* 2019;47(D1):D745-51.
- 796 37. Utsunomiya ATH, Santos DJ, Boison SA, Utsunomiya YT, Milanese M, Bickhart DM, et al. Revealing  
797 misassembled segments in the bovine reference genome by high resolution linkage disequilibrium  
798 scan. *BMC Genomics* 2016;17:705.
- 799 38. Hickey JM. Sequencing millions of animals for genomic selection 2.0. *Journal of Animal Breeding*  
800 *and Genetics* 2013;130:331-2.
- 801 39. Le SQ, Durbin R. SNP detection and genotyping from low-coverage sequencing data on multiple  
802 diploid samples. *Genome Res.* 2011;21:952-60.
- 803 40. Li Y, Sidore C, Kang HM, Boehnke M, Abecasis GR. Low-coverage sequencing: Implications for  
804 design of complex trait association studies. *Genome Res.* 2011;21:940-51.
- 805 41. Daetwyler HD, Capitan A, Pausch H, Stottthard P, van Binsbergen R, Brøndum RF, et al. Whole-  
806 genome sequencing of 234 bulls facilitates mapping of monogenic and complex traits in cattle.  
807 *Nat. Genet.* 2014;46:858-65.
- 808 42. Lilue J, Doran AG, Fiddes IT, Abrudan M, Armstrong J, Bennett R, et al. Sixteen diverse laboratory  
809 mouse reference genomes define strain-specific haplotypes and novel functional loci. *Nat. Genet.*  
810 2018;50:1574-83.

- 811 43. Baier U, Beller T, Ohlebusch E. Graphical pan-genome analysis with compressed suffix trees and  
812 the Burrows-Wheeler transform. *Bioinformatics* 2015;32:497–504.
- 813 44. Chaisson MJP, Wilson RK, Eichler EE. Genetic variation and the de novo assembly of human  
814 genomes. *Nat. Rev. Genet.* 2015;16:627–40.
- 815 45. Garrison E, Sirén J, Novak AM, Hickey G, Eizenga JM, Dawson ET, et al. Variation graph toolkit  
816 improves read mapping by representing genetic variation in the reference. *Nature Biotechnology*  
817 2018;36:875-9.
- 818 46. Andersson L, Archibald AL, Bottema CD, Brauning R, Burgess SC, Burt DW, et al. Coordinated  
819 international action to accelerate genome-to-phenome with FAANG, the Functional Annotation  
820 of Animal Genomes project. *Genome Biol.* 2015;16:57.
- 821 47. Foissac S, Djebali S, Munyard K, Vialaneix N, Rau A, Muret K, et al. Livestock genome annotation:  
822 transcriptome and chromatin structure profiling in cattle, goat and pig. *bioRxiv* (2018).  
823 doi:<https://doi.org/10.1101/316091>
- 824 48. Pendleton M, Sebra R, Pang AA, Ummat A, Franzen O, Rausch T, et al. Assembly and diploid  
825 architecture of an individual human genome via single-molecule technologies. *Nat. Methods*  
826 2015;12:780–6.
- 827 49. Chin CS, Alexander DH, Marks P, Klammer AA, Drake J, Heiner C, et al. Nonhybrid, finished  
828 microbial genome assemblies from long-read SMRT sequencing data. *Nat. Methods* 2013;10:563-  
829 9.
- 830 50. Hubley R, Finn RD, Clements J, Eddy SR, Jones TA, Bao W, et al. The Dfam database of repetitive  
831 DNA families. *Nucleic Acids Res.* 2016;44:D81–9.
- 832 51. Bao W, Kojima KK, Kohany O. Repbase Update, a database of repetitive elements in eukaryotic  
833 genomes. *Mobile DNA* 6(1). doi: 10.1186/s13100-015-0041-9. (2015).
- 834 52. Benson G. Tandem repeats finder: A program to analyze DNA sequences. *Nucleic Acids Res.*  
835 1999;27:573–80.

- 836 53. Miller JR, Hindkjær J, Thomsen PD. A chromosomal basis for the differential organization of a  
837 porcine centromere-specific repeat. *Cytogenet. Cell Genet.* 1993;62:37–41.
- 838 54. Riquet J, Mulsant P, Yerle M, Cristobal-Gaudy MS, Le Tissier P, Milan D, et al. Sequence analysis  
839 and genetic mapping of porcine chromosome 11 centromeric S0048 marker. *Cytogenet. Cell*  
840 *Genet.* 1996;74:127-32.
- 841 55. Quinlan AR, Hall IM. BEDTools: A flexible suite of utilities for comparing genomic features,  
842 *Bioinformatics* 2010;26:841–2.
- 843 56. Bolger AM, Lohse M, Usadel B. Trimmomatic: A flexible trimmer for Illumina sequence data.  
844 *Bioinformatics* 2014;30:2114–20.
- 845 57. Zhang J, Kobert K, Flouri T, Stamatakis A. PEAR: A fast and accurate Illumina Paired-End read  
846 mergeR. *Bioinformatics* 2014;30:614–20.
- 847 58. Grabherr MG, Haas BJ, Yassour M, Levin JZ, Thompson DA, Amit I, et al. Full-length transcriptome  
848 assembly from RNA-Seq data without a reference genome. *Nat Biotechnol* 2011;29:644–52.
- 849 59. Hackl T, Hedrich R, Schultz J, Förster F. Proovread: Large-scale high-accuracy PacBio correction  
850 through iterative short read consensus. *Bioinformatics* 2014;30:3004–11.
- 851 60. Li H, Durbin R. Fast and accurate short read alignment with Burrows-Wheeler transform.  
852 *Bioinformatics* 2009;25:1754-60.
- 853 61. Robinson JT, Thorvaldsdóttir H, Winckler W, Guttman M, Lander ES, Getz G, et al. Integrative  
854 genomics viewer. *Nat. Biotechnol.* 2011;29:24–6.
- 855 62. Koren S, Walenz BP, Berlin K, Miller JR, Bergman NH, Phillippy AM. Canu: Scalable and accurate  
856 long-read assembly via adaptive  $\kappa$ -mer weighting and repeat separation. *Genome Res.*  
857 2017;27:722–36.
- 858 63. Li H. Aligning sequence reads, clone sequences and assembly contigs with BWA-MEM.  
859 *ArXiv:1303.3997v1 [q-bio.GN]* (2013).

- 860 64. Walker BJ, Abeel T, Shea T, Priest M, Abouelliel A, Sakthikumar S, et al. Pilon: An integrated tool  
861 for comprehensive microbial variant detection and genome assembly improvement. *PLoS ONE*  
862 2014;9:e112963.
- 863 65. Anderson SI, Lopez-Corrales NL, Gorick B, Archibald AL. A large-fragment porcine genomic library  
864 resource in a BAC vector. *Mammalian Genome* 2000;11:811–4.
- 865 66. Morgulis A, Gertz EM, Schäffer AA, Agarwala R. A Fast and Symmetric DUST Implementation to  
866 Mask Low-Complexity DNA Sequences. *J Comp Biol* 2006;13:1028-40.
- 867 67. Down TA, Hubbard TJP. Computational detection and location of transcription start sites in  
868 mammalian genomic DNA. *Genome Res* 2002;12:458–61.
- 869 68. Lowe TM, Eddy SR. TRNAscan-SE: A program for improved detection of transfer RNA genes in  
870 genomic sequence. *Nucleic Acids Res* 1996;25:955–64.
- 871 69. Burge C, Karlin S. Prediction of complete gene structures in human genomic DNA. *J Mol Biol*  
872 1997;268:78–94.
- 873 70. O’Leary NA, Wright MW, Brister JR, Ciufu S, Haddad D, McVeigh R, et al. Reference sequence  
874 (RefSeq) database at NCBI: current status, taxonomic expansion, and functional annotation.  
875 *Nucleic Acids Res* 2016;44:D733-45.
- 876 71. Slater GSC, Birney E. Automated generation of heuristics for biological sequence comparison. *BMC*  
877 *Bioinformatics* 2005;6:31.
- 878 72. Frankish A, Diekhans M, Ferreira AM, Johnson R, Jungreis I, Loveland J, et al. GENCODE reference  
879 annotation for the human and mouse genomes. *Nucleic Acids Res* 2019;47:D766-73.
- 880 73. Li H. Minimap2: pairwise alignment for nucleotide sequences. *Bioinformatics* 2018;34:3094-3100.
- 881 74. She R, Chu JS, Uyar B, Wang J, Wang K, Chen N. genBlastG: Using BLAST searches to build  
882 homologous gene models. *Bioinformatics* 2011;27:2141–3.
- 883 75. Lefranc MP, Giudicelli V, Duroux P, Jabado-Michaloud J, Folch G, Aouinti S, et al. IMGT®, the  
884 international ImMunoGeneTics information system® 25 years on. *Nucleic Acids Res*  
885 2015;43:D413–22.

- 886 76. Lewis SE, Searle SMJ, Harris N, Gibson M, Iyer V, Richter J, et al. Apollo: a sequence annotation  
887 editor. *Genome Biol* 2002;3:research0082.1.
- 888 77. Griffiths-Jones S, Bateman A, Marshall M, Khanna A, Eddy SR. Rfam: An RNA family database',  
889 *Nucleic Acids Res* 2003;31:439–41.
- 890 78. Griffiths-Jones S, Grocock RJ, van Dongen S, Bateman A, Enright AJ. miRBase: microRNA  
891 sequences, targets and gene nomenclature. *Nucleic Acids Res* 2006;34:D140–4.
- 892 79. Lorenz R, Bernhart SH, Höner Zu Siederdisen C, Tafer H, Flamm C, Stadler PF, et al. ViennaRNA  
893 Package 2.0. *Algorithms Mol Biol* 2011;6:26.
- 894 80. Nawrocki EP, Eddy SR. Infernal 1.1: 100-fold faster RNA homology searches. *Bioinformatics*  
895 2013;29:2933-5.
- 896 81. Papatheodorou I, Fonesca NA, Keays M, Tang YA, Barrera E, Bazant W, et al. Expression Atlas:  
897 Gene and protein expression across multiple studies and organisms. *Nucleic Acids Res*  
898 2018;46:D246-51.
- 899



900 **Acknowledgements**

901 We are grateful to Chris Tyler-Smith (Wellcome Trust Sanger Institute) for sharing the SSCY sequence  
902 data for Sscrofa11.1. **Funding:** We are grateful for funding support from the i) Biotechnology and  
903 Biological Sciences Research Council (Institute Strategic Programme grants: BBS/E/D/20211550,  
904 BBS/E/D/10002070; and response mode grants: BB/F021372/1, BB/M011461/1, BB/M011615/1,  
905 BB/M01844X/1); ii) European Union through the Seventh Framework Programme Quantomics  
906 (KBBE222664); iii) University of Cambridge, Department of Pathology; iv) Wellcome Trust:  
907 WT108749/Z/15/Z; v) European Molecular Biology Laboratory; and vi) the Roslin Foundation. In  
908 addition HL and HB were supported by USDA NRSP-8 Swine Genome Coordination funding; SK and  
909 AMP were supported by the Intramural Research Program of the National Human Genome Research  
910 Institute, US National Institutes of Health; D.M.B was supported by USDA CRIS projects 8042-31000-  
911 001-00-D and 5090-31000-026-00-D. B.D.R was supported by USDA CRIS project 8042-31000-001-00-  
912 D. T.P.L.S. was supported by USDA CRIS project 3040-31000-100-00-D. This work used the  
913 computational resources of the NIH HPC Biowulf cluster (<https://hpc.nih.gov>); and the Iowa State  
914 University Lightning3 and ResearchIT clusters. The Ceres cluster (part of the USDA SCInet Initiative)  
915 was used to analyse part of this dataset.

916

917 **Author contributions**

918 A.L.A. and T.P.L.S. conceived, coordinated and managed the project; A.L.A., P.F., D.A.H., T.P.L.S. M.W.  
919 supervised staff and students performing the analyses; D.J.N., L.R., L.B.S., T.P.L.S. provided biological  
920 resources; R.H., K.S.K. and T.P.L.S. generated PacBio sequence data; H.A.F., T.P.L.S. and R.T. generated  
921 Illumina WGS and RNA-Seq data; N.A.A., C.A.S., B.M.S. provided SSCY assemblies; D.J.N, and T.P.L.S.  
922 generated Iso-Seq data; G.H., R.H., S.K., A.M.P., A.S.S, A.W. generated sequence assemblies; A.W.  
923 polished and quality checked Sscrofa11.1; W.C., G.H., K.H., S.K., B.D.R., A.S.S., S.G.S., E.T. performed  
924 quality checks on the sequence assemblies; R.E.O'C. and D.K.G. performed cytogenetics analyses; L.E.  
925 analysed repeat sequences; H.B., H.L., N.M., C.K.T. analysed Iso-Seq data; D.M.B. and G.A.R. analysed

926 sequence variants; B.A., K.B., C.G.G., T.H., O.I., F.J.M. annotated the assembled genome sequences;  
927 A.W. and A.L.A drafted the manuscript; all authors read and approved the final manuscript.

928

929 **Competing interests**

930 The authors declare that they have no competing interests.

931

932 **Data and materials availability**

933 The genome assemblies are deposited at NCBI under accession numbers GCA\_000003025  
934 (Scrofa11.1) and GCA\_002844635.1 (USMARCv1.0). The associated BioSample accession numbers are  
935 SAMN02953785 and SAMN07325927, respectively. Iso-seq and RNA-Seq data used for analysis and  
936 annotation are available under accession numbers PRJNA351265 and PRJEB19386, respectively.

937

938

939 **Figure 1. Assemblies and radiation hybrid map alignments.** Plots illustrating co-linearity between radiation hybrid map and a) Sscrofa11.1 and b) USMARCv1.0  
940 assemblies (autosomes only).

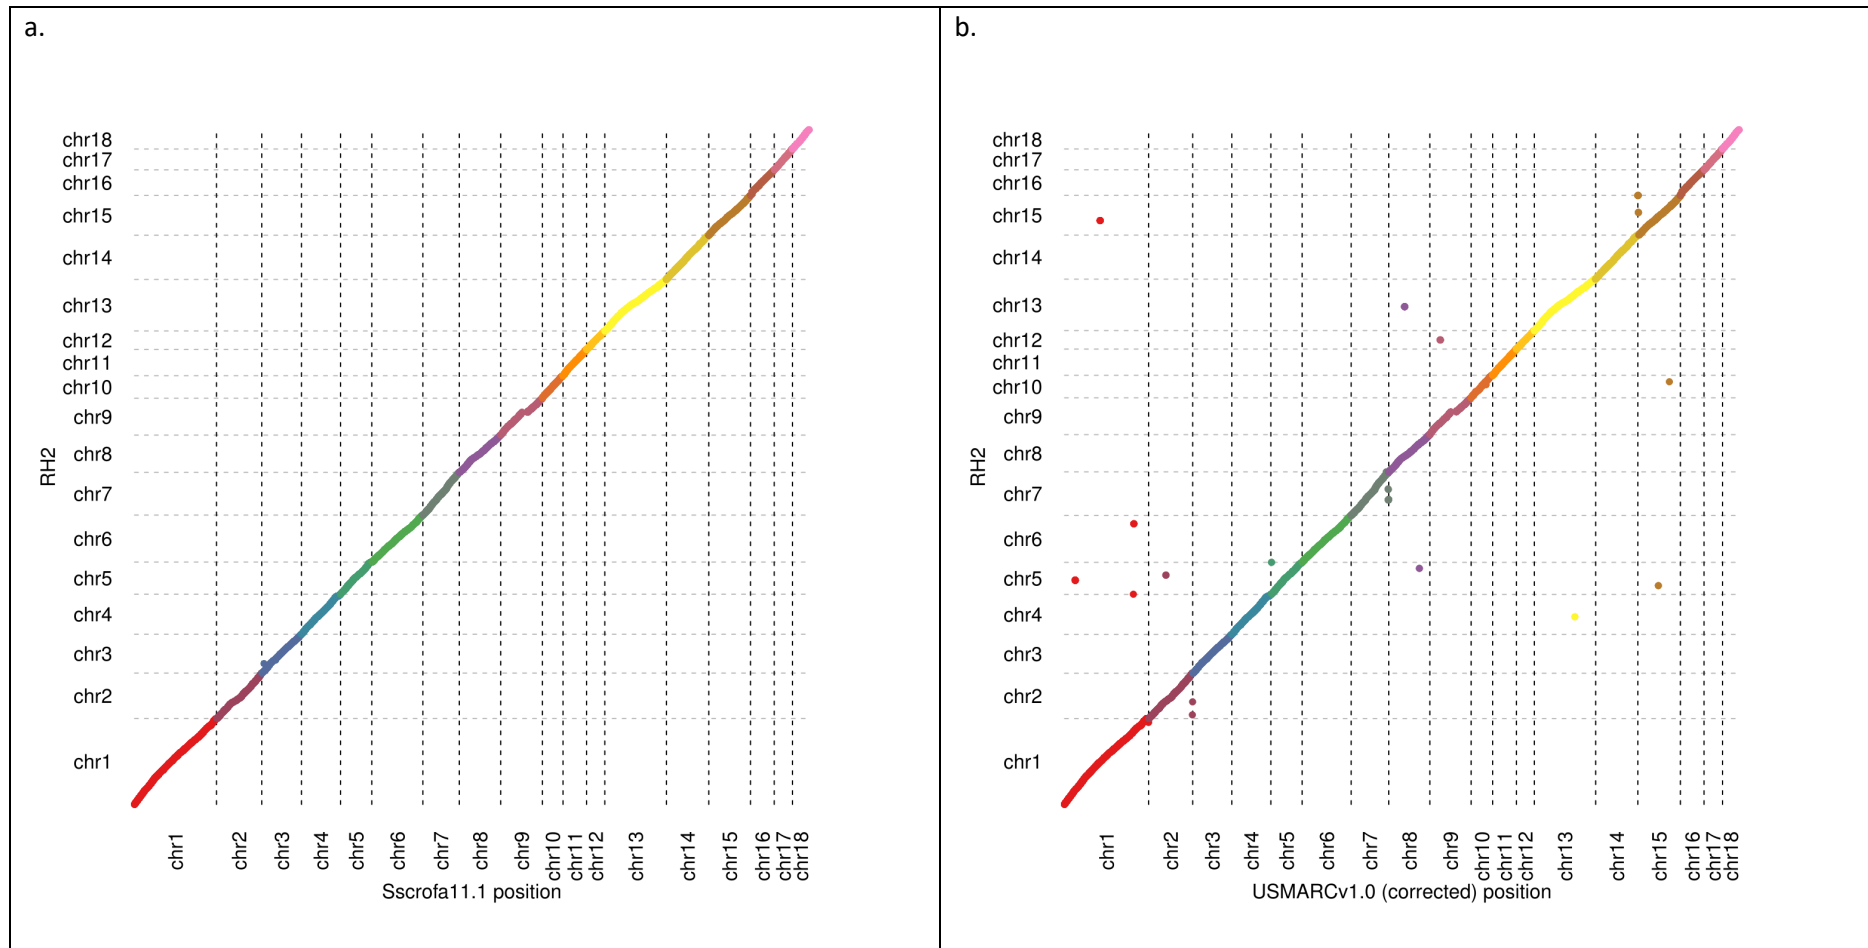

942 **Figure 2. Visualisation of improvements in assembly contiguity.** Graphical visualisation of contigs  
943 for Sscrofa11 (top) and Sscrofa10.2 (bottom) as alternating dark and light grey bars.

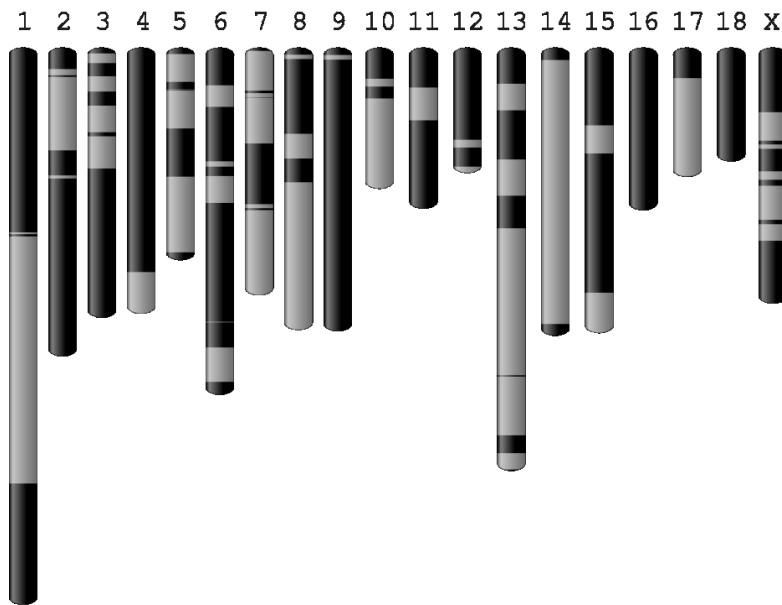

944

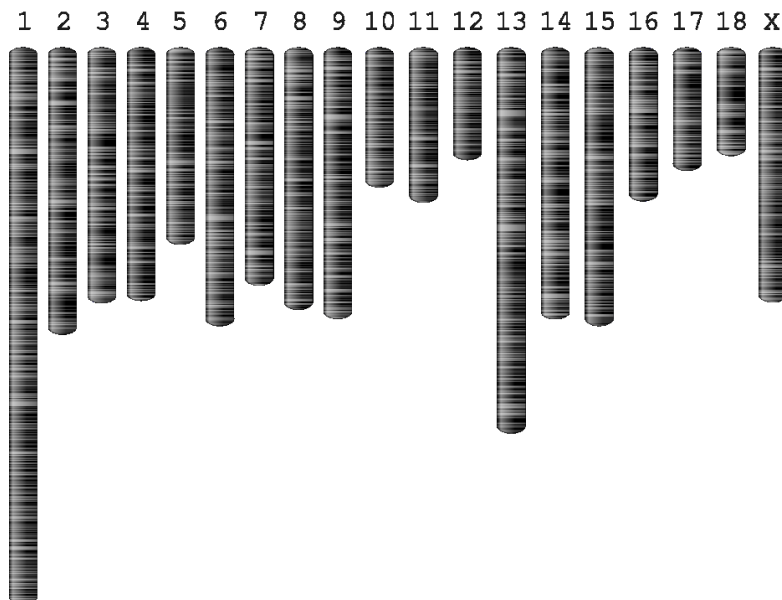

945

946

947

948 **Table 1. Assembly statistics.** Summary statistics for assembled pig genome sequences and comparison with current human reference genome. (source: NCBI,

949 <https://www.ncbi.nlm.nih.gov/assembly/>; \* includes mitochondrial genome.

| Assembly                     | Sscrofa10.2   | Sscrofa11     | Sscrofa11.1   | USMARCv1.0    | GRCh38.p12    |
|------------------------------|---------------|---------------|---------------|---------------|---------------|
| Total sequence length        | 2,808,525,991 | 2,456,768,445 | 2,501,912,388 | 2,755,438,182 | 3,099,706,404 |
| Total ungapped length        | 2,519,152,092 | 2,454,899,091 | 2,472,047,747 | 2,623,130,238 | 2,948,583,725 |
| Number of scaffolds          | 9,906         | 626           | 706           | 14,157        | 472           |
| Gaps between scaffolds       | 5,323         | 24            | 93            | 0             | 349           |
| Number of unplaced scaffolds | 4,562         | 583           | 583           | 14,136        | 126           |
| Scaffold N50                 | 576,008       | 88,231,837    | 88,231,837    | 131,458,098   | 67,794,873    |
| Scaffold L50                 | 1,303         | 9             | 9             | 9             | 16            |
| Number of unspanned gaps     | 5,323         | 24            | 93            | 0             | 349           |
| Number of spanned gaps       | 233,116       | 79            | 413           | 661           | 526           |
| Number of contigs            | 243,021       | 705           | 1,118         | 14,818        | 998           |
| Contig N50                   | 69,503        | 48,231,277    | 48,231,277    | 6,372,407     | 57,879,411    |
| Contig L50                   | 8,632         | 15            | 15            | 104           | 18            |
| Number of chromosomes*       | *21           | 19            | *21           | *21           | 24            |

950

951

952 **Table 2. Summary of quality statistics for SSC1-18, SSCX.** Quality measures and terms as defined [14].

953

|                                                         | Mean<br>(Sscrofa11) | Std<br>(Sscrofa11) | Bases<br>(Sscrofa11) | % genome<br>(Sscrofa11) | % genome<br>(Sscrofa10.2) |
|---------------------------------------------------------|---------------------|--------------------|----------------------|-------------------------|---------------------------|
| High Coverage                                           | 50                  | 7                  | 119,341,205          | 4.9                     | 2.6                       |
| Low Coverage (LC)                                       | 50                  | 7                  | 185,385,536          | 7.5                     | 26.6                      |
| % Properly paired                                       | 86                  | 6.8                | 95,508,007           | 3.9                     | 4.95                      |
| % High inserts                                          | 0.3                 | 1.6                | 40,835,320           | 1.72                    | 1.52                      |
| % Low inserts                                           | 8.2                 | 4.3                | 114,793,298          | 4.7                     | 3.99                      |
| Low quality (LQ)                                        | -                   | -                  | 284,838,040          | 11.6                    | 13.85                     |
| Total LQLC                                              | -                   | -                  | 399,927,747          | 16.3                    | 33.07                     |
| LQLC windows that do not intersect RepeatMasker regions |                     |                    | 39,918,551           | 1.6                     |                           |

954

955

956 **Table 3. Annotation statistics.** Ensembl annotation of pig (Sscrofa10.2, Sscrofa11.1, USMARCv1.0), human (GRCh38.p12) and mouse (GRCm38.p6)  
 957 assemblies.

958

|                          | Sscrofa10.2                       | Sscrofa11.1          | USMARCv1.0           | GRCh38.p13                      | GRCm38.p6                       |
|--------------------------|-----------------------------------|----------------------|----------------------|---------------------------------|---------------------------------|
|                          | Ensembl (Release 89)              | Ensembl (Release 98) | Ensembl (Release 97) | Ensembl (Release 98)            | Ensembl (Release 98)            |
| Coding genes             | 21,630<br>(Incl. 10 read through) | 21,301               | 21,535               | 20,444<br>incl 667 read through | 22,508<br>incl 270 read through |
| Non-coding genes         | 3,124                             | 8,971                | 6,113                | 23,949                          | 16,078                          |
| small non-coding genes   | 2,804                             | 2,156                | 2,427                | 4,871                           | 5,531                           |
| long non-coding genes    | 135<br>(incl 1 read through)      | 6,798                | 3,307                | 16,857<br>incl 304 read through | 9,985<br>incl 75 read through   |
| misc. non-coding genes   | 185                               | 17                   | 379                  | 2,221                           | 562                             |
| Pseudogenes              | 568                               | 1,626                | 674                  | 15,214<br>incl 8 read through   | 13,597<br>incl 4 read through   |
| Gene transcripts         | 30,585                            | 63,041               | 58,692               | 227,530                         | 142,446                         |
| Genscan gene predictions | 52,372                            | 46,573               | 152,168              | 51,756                          | 57,381                          |
| Short variants           | 60,389,665                        | 64,310,125           |                      | 665,834,144                     | 83,761,978                      |
| Structural variants      | 224,038                           | 224,038              |                      | 6,013,113                       | 791,878                         |

959

960
