1 An improved pig reference genome sequence to enable pig genetics and genomics research

2

3

4 Amanda Warr<sup>1</sup>, Nabeel Affara<sup>2</sup>, Bronwen Aken<sup>3</sup>, Hamid Beiki<sup>4</sup> Derek M Bickhart<sup>5</sup>,  
5 Konstantinos Billis<sup>3</sup>, William Chow<sup>6</sup>, Lel Eory<sup>1</sup>, Heather A Finlayson<sup>1</sup>, Paul Flicek<sup>3</sup>, Carlos G  
6 Girón<sup>3</sup>, Darren K Griffin<sup>7</sup>, Richard Hall<sup>8</sup>, Gregory Hannum<sup>9</sup>, Thibaut Hourlier<sup>3</sup>, Kerstin Howe<sup>6</sup>,  
7 David A Hume<sup>1,@</sup>, Osagie Izuogu<sup>3</sup>, Kristi Kim<sup>8</sup>, Sergey Koren<sup>10</sup>, Haibo Liu<sup>4</sup>, Nancy  
8 Manchanda<sup>11</sup>, Fergal J Martin<sup>3</sup>, Dan J Nonneman<sup>12</sup>, Rebecca E O'Connor<sup>7</sup>, Adam M  
9 Phillippy<sup>10</sup>, Gary A. Rohrer<sup>12</sup>, Benjamin D. Rosen<sup>13</sup>, Laurie A Rund<sup>14</sup>, Carole A Sargent<sup>2</sup>,  
10 Lawrence B Schook<sup>14</sup>, Steven G. Schroeder<sup>13</sup>, Ariel S Schwartz<sup>9</sup>, Benjamin M Skinner<sup>2</sup>,  
11 Richard Talbot<sup>15</sup>, Elisabeth Tseng<sup>8</sup>, Christopher K Tuggle<sup>4,11</sup>, Mick Watson<sup>1</sup>, Timothy P L  
12 Smith<sup>12\*</sup> & Alan L Archibald<sup>1\*</sup>

13

14 <sup>1</sup>The Roslin Institute and Royal (Dick) School of Veterinary Studies, University of Edinburgh,  
15 Edinburgh EH25 9RG, U.K.

16 <sup>2</sup>Department of Pathology, University of Cambridge, Cambridge CB2 1QP, U.K.

17 <sup>3</sup>European Molecular Biology Laboratory, European Bioinformatics Institute, Hinxton, CB10  
18 1SD, U.K.

19 <sup>4</sup>Department of Animal Science, Iowa State University, Ames, Iowa, U.S.A.

20 <sup>5</sup>Dairy Forage Research Center, USDA-ARS, Madison, Wisconsin, U.S.A.

21 <sup>6</sup>Wellcome Sanger Institute, Cambridge, CB10 1SA, U.K.

22 <sup>7</sup>School of Biosciences, University of Kent, Canterbury CT2 7AF, U.K.

23 <sup>8</sup>Pacific Biosciences, Menlo Park, California, U.S.A.

24 <sup>9</sup>Denovium Inc., San Diego, California, U.S.A.

25 <sup>10</sup>Genome Informatics Section, Computational and Statistical Genomics Branch, National  
26 Human Genome Research Institute, Bethesda, Maryland, U.S.A.

27 <sup>11</sup>Bioinformatics and Computational Biology Program, Iowa State University, Ames, Iowa,  
28 U.S.A.

29 <sup>12</sup>USDA-ARS U.S. Meat Animal Research Center, Clay Center, Nebraska 68933, U.S.A.

30 <sup>13</sup>Animal Genomics and Improvement Laboratory, USDA-ARS, Beltsville, Maryland, U.S.A.

31 <sup>14</sup>Department of Animal Sciences, University of Illinois, Urbana, Illinois, U.S.A.

32 <sup>15</sup>Edinburgh Genomics, University of Edinburgh, Edinburgh EH9 3FL, U.K.

33

34 @ Current address: Mater Research Institute-University of Queensland, Translational

35 Research Institute, Brisbane, QLD 4102, Australia

36

37 \*Corresponding authors: [alan.archibald@roslin.ed.ac.uk](mailto:alan.archibald@roslin.ed.ac.uk) [tim.smith@ARS.USDA.GOV](mailto:tim.smith@ARS.USDA.GOV)

38 [mick.watson@roslin.ed.ac.uk](mailto:mick.watson@roslin.ed.ac.uk)

39 **Abstract**

40 The domestic pig (*Sus scrofa*) is important both as a food source and as a biomedical model  
41 with high anatomical and immunological similarity to humans. The draft reference genome  
42 (Sscrofa10.2) represented a purebred female pig from a commercial pork production breed  
43 (Duroc), and was established using older clone-based sequencing methods. The  
44 Sscrofa10.2 assembly was incomplete and unresolved redundancies, short range order and  
45 orientation errors and associated misassembled genes limited its utility. We present two  
46 highly contiguous chromosome-level genome assemblies created with more recent long  
47 read technologies and a whole genome shotgun strategy, one for the same Duroc female  
48 (Sscrofa11.1) and one for an outbred, composite breed male animal commonly used for  
49 commercial pork production (USMARCv1.0). Both assemblies are of substantially higher  
50 (>90-fold) continuity and accuracy compared to the earlier reference, and the availability of  
51 two independent assemblies provided an opportunity to identify large-scale variants and to  
52 error-check the accuracy of representation of the genome. We propose that the improved  
53 Duroc breed assembly (Sscrofa11.1) become the reference genome for genomic research in  
54 pigs.

55

56

## 57 **Introduction**

58 High quality, richly annotated reference genome sequences are key resources and provide  
59 important frameworks for the discovery and analysis of genetic variation and for linking  
60 genotypes to function. In farmed animal species such as the domestic pig (*Sus scrofa*)  
61 genome sequences have been integral to the discovery of molecular genetic variants and  
62 the development of single nucleotide polymorphism (SNP) chips<sup>1</sup> and enabled efforts to  
63 dissect the genetic control of complex traits, including responses to infectious diseases<sup>2</sup>.

64 Genome sequences are not only an essential resource for enabling research but also for  
65 applications in the life sciences. Genomic selection, in which associations between  
66 thousands of SNPs and trait variation as established in a phenotyped training population are  
67 used to choose amongst selection candidates for which there are SNP data but no  
68 phenotypes, has delivered genomics-enabled genetic improvement in farmed animals<sup>3</sup> and  
69 plants. From its initial successful application in dairy cattle breeding, genomic selection is  
70 now being used in many sectors within animal and plant breeding, including by leading pig  
71 breeding companies<sup>4,5</sup>.

72 The domestic pig (*Sus scrofa*) has importance not only as a source of animal protein but  
73 also as a biomedical model. The choice of the optimal animal model species for  
74 pharmacological or toxicology studies can be informed by knowledge of the genome and  
75 gene content of the candidate species including pigs<sup>6</sup>. A high quality, richly annotated  
76 genome sequence is also essential when using gene editing technologies to engineer  
77 improved animal models for research or as sources of cells and tissue for  
78 xenotransplantation and potentially for improved productivity<sup>7,8</sup>.

79 The highly contiguous pig genome sequences reported here are built upon a quarter of a  
80 century of effort by the global pig genetics and genomics research community including the  
81 development of recombination and radiation hybrid maps<sup>9,10</sup>, cytogenetic and Bacterial  
82 Artificial Chromosome (BAC) physical maps<sup>11,12</sup> and a draft reference genome sequence<sup>13</sup>.

83 The previously published draft pig reference genome sequence (Sscrofa10.2), developed  
84 under the auspices of the Swine Genome Sequencing Consortium (SGSC), has a number of

85 significant deficiencies<sup>14–17</sup>. The BAC-by-BAC hierarchical shotgun sequence approach<sup>18</sup>  
86 using Sanger sequencing technology can yield a high quality genome sequence as  
87 demonstrated by the public Human Genome Project. However, with a fraction of the financial  
88 resources of the Human Genome Project, the resulting draft pig genome sequence  
89 comprised an assembly, in which long-range order and orientation is good, but the order and  
90 orientation of sequence contigs within many BAC clones was poorly supported and the  
91 sequence redundancy between overlapping sequenced BAC clones was often not resolved.  
92 Moreover, about 10% of the pig genome, including some important genes, were not  
93 represented (e.g. CD163), or incompletely represented (e.g. IGF2) in the assembly<sup>19</sup>. Whilst  
94 the BAC clones represent an invaluable resource for targeted sequence improvement and  
95 gap closure as demonstrated for chromosome X (SSCX)<sup>20</sup>, a clone-by-clone approach to  
96 sequence improvement is expensive notwithstanding the reduced cost of sequencing with  
97 next-generation technologies.

98 The dramatically reduced cost of whole genome shotgun sequencing using Illumina short  
99 read technology has facilitated the sequencing of several hundred pig genomes<sup>17,21,22</sup>. Whilst  
100 a few of these additional pig genomes have been assembled to contig level, most of these  
101 genome sequences have simply been aligned to the reference and used as a resource for  
102 variant discovery.

103 The increased capability and reduced cost of third generation long read sequencing  
104 technology as delivered by Pacific Biosciences and Oxford Nanopore platforms, have  
105 created the opportunity to generate the data from which to build highly contiguous genome  
106 sequences as illustrated recently for cattle<sup>23,24</sup>. Here we describe the use of Pacific  
107 Biosciences (PacBio) long read technology to establish highly continuous pig genome  
108 sequences that provide substantially improved resources for pig genetics and genomics  
109 research and applications.

110

## 111 **Results**

112 Two individual pigs were sequenced independently: a) TJ Tabasco (Duroc 2-14) i.e. the sow  
113 that was the primary source of DNA for the published draft genome sequence  
114 (Sscrofa10.2)<sup>13</sup> and b) MARC1423004 which was a Duroc/Landrace/Yorkshire crossbred  
115 barrow (i.e. castrated male pig) from the USDA Meat Animal Research Center. The former  
116 allowed us to build upon the earlier draft genome sequence, exploit the associated CHORI-  
117 242 BAC library resource ([https://bacpacresources.org/  
118 http://bacpacresources.org/porcine242.htm](https://bacpacresources.org/http://bacpacresources.org/porcine242.htm)) and evaluate the improvements achieved by  
119 comparison with Sscrofa10.2. The latter allowed us to assess the relative efficacy of a  
120 simpler whole genome shotgun sequencing and Chicago Hi-Rise scaffolding strategy<sup>25</sup>. This  
121 second assembly also provided data for the Y chromosome, and supported comparison of  
122 haplotypes between individuals. In addition, full-length transcript sequences were collected  
123 for multiple tissues from the MARC1423004 animal, and used in annotating both genomes.

124

### 125 Sscrofa11.1 assembly

126 Approximately sixty-five fold coverage (176 Gb) of the genome of TJ Tabasco (Duroc 2-14)  
127 was generated using Pacific Biosciences (PacBio) single-molecule real-time (SMRT)  
128 sequencing technology. A total of 213 SMRT cells produced 12,328,735 subreads of  
129 average length 14,270 bp and with a read N50 of 19,786 bp (Supplementary Table ST1).  
130 Reads were corrected and assembled using Falcon (v.0.4.0)<sup>26</sup>, achieving a minimum  
131 corrected read cutoff of 13 kb that provided 19-fold genome coverage for input resulting in  
132 an initial assembly comprising 3,206 contigs with a contig N50 of 14.5 Mb.

133 The contigs were mapped to the previous draft assembly (Sscrofa10.2) using Nucmer<sup>27</sup>. The  
134 long range order of the Sscrofa10.2 assembly was based on fingerprint contig (FPC)<sup>12</sup> and  
135 radiation hybrid physical maps with assignments to chromosomes based on fluorescent *in*  
136 *situ* hybridisation data. This alignment of Sscrofa10.2 and the contigs from the initial Falcon  
137 assembly of the PacBio data provided draft scaffolds that were tested for consistency with  
138 paired BAC and fosmid end sequences and the radiation hybrid map<sup>13</sup>. The draft scaffolds

139 also provided a framework for gap closure using PBJelly<sup>28</sup>, or finished quality Sanger  
140 sequence data generated from CHORI-242 BAC clones from earlier work<sup>13,20</sup>.

141 Remaining gaps between contigs within scaffolds, and between scaffolds predicted to be  
142 adjacent on the basis of other available data, were targeted for gap filling with a combination  
143 of unplaced contigs and previously sequenced BACs, or by identification and sequencing of  
144 BAC clones predicted from their end sequences to span the gaps. The combination of  
145 methods filled 2,501 gaps and reduced the number of contigs in the assembly from 3,206 to  
146 705. The assembly, Sscrofa11 (GCA\_000003025.5), had a final contig N50 of 48.2 Mb, only  
147 103 gaps in the sequences assigned to chromosomes, and only 583 remaining unplaced  
148 contigs (Table 1). Two acrocentric chromosomes (SSC16, SSC18) were each represented  
149 by single, unbroken contigs. The SSC18 assembly also includes centromeric and telomeric  
150 repeats (Supplementary Tables ST5, ST6; Supplementary Figures SF9, SF10), albeit the  
151 former probably represent a collapsed version of the true centromere. The reference  
152 genome assembly was completed by adding Y chromosome sequences from other sources  
153 (GCA\_900119615.2)<sup>20</sup> because TJ Tabasco (Duroc 2-14) was female. The resulting  
154 reference genome sequence was termed Sscrofa11.1 and deposited in the public sequence  
155 databases (GCA\_000003025.6) (Table 1).

156 The medium to long range order and orientation of Sscrofa11.1 assembly was assessed by  
157 comparison to an existing radiation hybrid (RH) map<sup>9</sup>. The comparison strongly supported  
158 the overall accuracy of the assembly (Figure 1a), despite the fact that the RH map was  
159 prepared from a cell line of a different individual. There is one major disagreement between  
160 the RH map and the assembly on chromosome 3, which will need further investigating. The  
161 only other substantial disagreement on chromosome 9, is explained by a gap in the RH  
162 map<sup>9</sup>. The assignment and orientation of the Sscrofa11.1 scaffolds to chromosomes was  
163 confirmed with fluorescent *in situ* hybridisation (FISH) of BAC clones (Supplementary Table  
164 ST2, Supplementary Figure SF1). The BAC end sequences and in some cases complete  
165 BAC clone sequences from the BAC clones used as probes for FISH analyses were aligned

166 with the Sscrofa11.1 assembly in order to establish the link between the FISH results and  
167 the assembly.

168 The quality of the Sscrofa11 assembly, which corresponds to Sscrofa11.1 after the exclusion  
169 of SSCY, was assessed as described previously for the existing Sanger sequence based  
170 draft assembly (Sscrofa10.2)<sup>14</sup>. Alignments of Illumina sequence reads from the same  
171 female pig were used to identify regions of low quality (LQ) or low coverage (LC) (Table 2).  
172 The analysis confirms that Sscrofa11 represents a significant improvement over the  
173 Sscrofa10.2 draft assembly. For example, the Low Quality Low Coverage (LQLC) proportion  
174 of the genome sequence has dropped from 33.07% to 16.3% when repetitive sequence is  
175 not masked, and falls to 1.6% when repeats are masked prior to read alignment. The  
176 remaining LQLC segments of Sscrofa11 may represent regions where short read coverage  
177 is low due to known systematic errors of the short read platform related to GC content, rather  
178 than deficiencies of the assembly.

179 The Sscrofa11.1 assembly was also assessed visually using gEVAL<sup>29</sup>. The improvement in  
180 short range order and orientation as revealed by alignments with isogenic BAC and fosmid  
181 end sequences is illustrated for a particularly poor region of Sscrofa10.2 on chromosome 12  
182 (Supplementary Figure SF12). The problems in this area of Sscrofa10.2 arise from failures  
183 to order and orient the sequence contigs and resolve the redundancies between these  
184 sequence contigs within BAC clone CH242-147O24 (FP102566.2). The improved contiguity  
185 in Sscrofa11.1 not only resolves these local order and orientation errors, but also facilitates  
186 the annotation of a complete gene model for the *ABR* locus. Further examples of  
187 comparisons of Sscrofa10.2 and Sscrofa11.1 reveal improvements in contiguity, local order  
188 and orientation and gene models (Supplementary Figure SF13-15).

189

#### 190 USMARCv1.0 assembly

191 Approximately sixty-five fold coverage of the genome of the MARC1423004 barrow was  
192 generated on a PacBio RSII instrument. The sequence was collected during the transition  
193 from P5/C3 to P6/C4 chemistry, with approximately equal numbers of subreads from each



194 chemistry. A total of 199 cells of P5/C3 chemistry produced 95.3 Gb of sequence with mean  
195 subread length of 5.1 kb and subread N50 of 8.2 kb. A total of 127 cells of P6/C4 chemistry  
196 produced 91.6 Gb of sequence with mean subread length 6.5 kb and subread N50 of  
197 10.3 kb, resulting in an overall average subread length, including data from both chemistries,  
198 of 6.4 kb. The reads were assembled using Celera Assembler 8.3rc2<sup>30</sup> and Falcon  
199 (<https://pb-falcon.readthedocs.io/en/latest/about.html>). The resulting assemblies were  
200 compared and the Celera Assembler result was selected based on better agreement with a  
201 Dovetail Chicago® library<sup>25</sup>, and was used to create a scaffolded assembly with the HiRise™  
202 scaffolder consisting of 14,818 contigs with a contig N50 of 6.372 Mb (GenBank accession  
203 GCA\_002844635.1; Table 1). The USMARCv1.0 scaffolds were therefore completely  
204 independent of the existing Sscrofa10.2 or new Sscrofa11.1 assemblies, and they can act as  
205 supporting evidence where they agree with those assemblies. However, chromosome  
206 assignment of the scaffolds was performed by alignment to Sscrofa10.2, and does not  
207 constitute independent confirmation of this ordering. The assignment of these scaffolds to  
208 individual chromosomes was confirmed post-hoc by FISH analysis as described for  
209 Sscrofa11.1 above. The FISH analysis revealed that several scaffold assemblies (SSC1, 5,  
210 6-11, 13-16) are inverted with respect to the chromosome (Supplementary Table ST2,  
211 Supplementary Figures SF1, 3-5). After correcting the orientation of these inverted scaffolds,  
212 there is good agreement between the USMARCv1.0 assembly and the RH map<sup>9</sup> (Figure 1b).

213

#### 214 Sscrofa11.1 and USMARCv1.0 are co-linear

215 The alignment of the two PacBio assemblies reveals a high degree of agreement and  
216 co-linearity, after correcting the inversions of several USMARCv1.0 chromosome assemblies  
217 (Supplementary Figure SF2). The agreement between the Sscrofa11.1 and USMARCv1.0  
218 assemblies is also evident in comparisons of specific loci (Supplementary Figures SF13-15)  
219 although with some differences (e.g. Supplementary Figure SF14). The whole genome  
220 alignment of Sscrofa11.1 and USMARCv1.0 (Supplementary Figure SF2) masks some  
221 inconsistencies that are evident when the alignments are viewed on a single chromosome-

222 by-chromosome basis (Supplementary Figures SF3-5). It remains to be determined whether  
223 the small differences between the assemblies represent errors in the assemblies, or true  
224 structural variation between the two individuals (see discussion of the *ERLIN1* locus below).

225

#### 226 Repetitive sequences, centromeres and telomeres

227 The repetitive sequence content of the Sscrofa11.1 and USMARCv1.0 was identified and  
228 characterised as described in the Supplementary Materials. These analyses allowed the  
229 identification of centromeres and telomeres for several chromosomes. The previous  
230 reference genome (Sscrofa10.2) that was established from Sanger sequence data and a  
231 minipig genome (minipig\_v1.0, GCA\_000325925.2) that was established from Illumina short  
232 read sequence data were also included for comparison.

233

#### 234 Completeness of the assemblies

235 The Sscrofa11.1 and USMARCv1.0 assemblies were assessed for completeness using two  
236 tools, BUSCO (Benchmarking Universal Single-Copy Orthologs)<sup>31</sup> and Cogent  
237 (<https://github.com/Magdoll/Cogent>). BUSCO uses a database of expected gene content  
238 based on near-universal single-copy orthologs from species with genomic data, while  
239 Cogent uses transcriptome data from the organism being sequenced, and therefore provides  
240 an organism-specific view of genome completeness. BUSCO analysis suggests both new  
241 assemblies are highly complete, with 93.8% and 93.1% of BUSCOs complete for  
242 Sscrofa11.1 and USMARCv1.0 respectively, a marked improvement on the 80.9% complete  
243 in Sscrofa10.2 (Supplementary Table ST3).

244 Cogent is a tool that identifies gene families and reconstructs the coding genome using high-  
245 quality transcriptome data without a reference genome, and can be used to check  
246 assemblies for the presence of these known coding sequences. The PacBio transcriptome  
247 (Iso-Seq data, from nine adult tissues)<sup>32</sup> used for the Cogent analyses originated from the  
248 MARC1423004 animal. Thus, it is possible that genes flagged as absent or fragmented  
249 genes by the Cogent analysis of Sscrofa11.1 are missing due to true deletion events in the

250 Duroc 2-14 genome rather than errors in the assembly. There were five genes that were  
251 present in the Iso-Seq data, but missing in the Sscrofa11.1 assembly. In each of these five  
252 cases, a Cogent partition (which consists of 2 or more transcript isoforms of the same gene,  
253 often from multiple tissues) exists in which the predicted transcript does not align back to  
254 Sscrofa11.1. NCBI-BLASTN of the isoforms from the partitions revealed them to have near  
255 perfect hits with existing annotations for *CHAMP1*, *ERLIN1*, *IL1RN*, *MB*, and *PSD4*.  
256 *ERLIN1* is missing in Sscrofa11.1, in its expected location there is a tandem duplication of  
257 the neighbouring gene *CYP2C33* (Supplementary Figure SF16), which the Illumina and BAC  
258 data in this region support, suggesting this area may represent a true haplotype. Indeed, a  
259 copy number variant (CNV) nsv1302227 has been mapped to this location on SSC14<sup>33</sup> and  
260 the *ERLIN1* gene sequences present in BAC clone CH242-513L2 (ENA: CT868715.3) were  
261 incorporated into the earlier Sscrofa10.2 assembly. However, an alternative haplotype  
262 containing *ERLIN1* was not found in any of the assembled contigs from Falcon and this will  
263 require further investigation. The *ERLIN1* locus is present on SSC14 in the USMARCv1.0  
264 assembly (30,107,823 – 30,143,074; note the USMARCv1.0 assembly of SSC14 is inverted  
265 relative to Sscrofa11.1) as determined with a BLAST search with the sequence of pig  
266 *ERLIN1* mRNA (NM\_001142896.1).  
267 The other 4 genes are annotated in neither Sscrofa10.2 nor Sscrofa11.1. Two of these  
268 genes, *IL1RN* and *PSD4*, are present in the original Falcon contigs, however they were  
269 trimmed off during the contig QC stage because of apparent abnormal Illumina, BAC and  
270 fosmid mapping in the region which was likely caused by the repetitive nature of their  
271 expected location on chromosome 3 where a gap is present. *CHAMP1* is expected to be in  
272 the telomeric region of chromosome 11, and is present in an unplaced scaffold of  
273 USMARCv1.0, so it is likely the gene is erroneously missing from the end of chromosome  
274 11. Genes expected to neighbour *MB*, such as *RSD2* and *HMOX1*, are annotated in  
275 Sscrofa11.1, but are on unplaced scaffolds AEMK02000361.1 and AEMK02000361.1,  
276 respectively. A gene annotated in *MB*'s expected position (ENSSSCG00000032277)  
277 appears to be a fragment of *MB*, but as there is no gap in the assembly it is likely that the

278 incomplete MB is a result of a misassembly in this region. This interpretation is supported by  
279 a break in the pairs of BAC and fosmid end sequences that map to this region of the  
280 Sscrofa11.1 assembly. The *MB* gene is present in the USMARCv1.0 assembly flanked as  
281 expected by *HMOX1* and *RBFOX2*. Cogent analysis also identified 2 cases of potential  
282 fragmentation in the Sscrofa11.1 genome assembly that resulted in the isoforms being  
283 mapped to two separate loci, though these will require further investigation. In summary, the  
284 BUSCO and Cogent analyses indicate that the Sscrofa11.1 assembly captures a very high  
285 proportion of the expressed elements of the genome.

286

### 287 Improved annotation

288 Annotation of Sscrofa11.1 was carried out with the Ensembl annotation pipeline and  
289 released via the Ensembl Genome Browser<sup>34</sup>  
290 ([http://www.ensembl.org/Sus\\_scrofa/Info/Index](http://www.ensembl.org/Sus_scrofa/Info/Index)) (Ensembl release 90, August 2017).  
291 Statistics for the annotation are listed in Table 3. This annotation is more complete than that  
292 of Sscrofa10.2 and includes fewer fragmented genes and pseudogenes.

293 The annotation pipeline utilised extensive short read RNA-Seq data from 27 tissues and long  
294 read PacBio Iso-Seq data from 9 adult tissues. This provided an unprecedented window into  
295 the pig transcriptome and allowed for not only an improvement to the main gene set, but also  
296 the generation of tissue-specific gene tracks from each tissue sample. The use of Iso-Seq  
297 data also improved the annotation of UTRs, as they represent transcripts sequenced across  
298 their full length from the polyA tract.

299 In addition to improved gene models, annotation of the Sscrofa11.1 assembly provides a  
300 more complete view of the porcine transcriptome than annotation of the previous assembly  
301 (Sscrofa10.2; Ensembl releases 67-89, May 2012 – May 2017) with increases in the  
302 numbers of transcripts annotated (Table 3). However, the number of annotated transcripts  
303 remains lower than in the human and mouse genomes. The annotation of the human and  
304 mouse genomes and in particular the gene content and encoded transcripts has been more  
305 thorough as a result of extensive manual annotation.

306 Efforts were made to annotate important classes of genes, in particular immunoglobulins and  
307 olfactory receptors. For these genes, sequences were downloaded from specialist  
308 databases and the literature in order to capture as much detail as possible (see  
309 supplementary information for more details).

310 These improvements in terms of the resulting annotation were evident in the results of the  
311 comparative genomics analyses run on the gene set. The previous annotation had 12,919  
312 one-to-one orthologs with human, while the new annotation of the Sscrofa11.1 assembly has  
313 15,543. Similarly, in terms of conservation of synteny, the previous annotation had 11,661  
314 genes with high confidence gene order conservation scores, while the new annotation has  
315 15,958. There was also a large reduction in terms of genes that were either abnormally short  
316 or split when compared to their orthologs in the new annotation.

317 The Sscrofa11.1 assembly has also been annotated using the NCBI pipeline  
318 ([https://www.ncbi.nlm.nih.gov/genome/annotation\\_euk/Sus\\_scrofa/106/](https://www.ncbi.nlm.nih.gov/genome/annotation_euk/Sus_scrofa/106/)). We have  
319 compared these two annotations. The Ensembl and NCBI annotations of Sscrofa11.1 are  
320 broadly similar (Supplementary Table ST14). There are 18,722 protein coding genes and  
321 811 non-coding genes in common. However, 1,625 of the genes annotated as protein-  
322 coding by Ensembl are annotated as pseudogenes by NCBI and 1,378 genes annotated as  
323 non-coding by NCBI are annotated as protein-coding by Ensembl. The NCBI RefSeq  
324 annotation can be visualised in the Ensembl Genome Browser by loading the RefSeq GFF3  
325 track and the annotations compared at the individual locus level. Similarly, the Ensembl  
326 annotated genes can be visualised in the NCBI Genome Browser. More recently, we have  
327 annotated the USMARCv1.0 assembly using the Ensembl pipeline and this annotation was  
328 released via the Ensembl Genome Browser  
329 ([https://www.ensembl.org/Sus\\_scrofa\\_usmarc/Info/Index](https://www.ensembl.org/Sus_scrofa_usmarc/Info/Index)) (Ensembl release 97, July 2019;  
330 see Table 3 for summary statistics).

331

332

## 333 Discussion

334 We have assembled a superior, extremely continuous reference assembly (Sscrofa11.1) by  
335 leveraging the excellent contig lengths provided by long reads, and a wealth of available  
336 data including Illumina paired-end, BAC end sequence, finished BAC sequence, fosmid end  
337 sequences, and the earlier curated draft assembly (Sscrofa10.2). The pig genome  
338 assemblies USMARCv1.0 and Sscrofa11.1 reported here are 92-fold to 694-fold  
339 respectively, more continuous than the published draft reference genome sequence  
340 (Sscrofa10.2)<sup>13</sup>. The new pig reference genome assembly (Sscrofa11.1) with its contig N50  
341 of 48,231,277 bp and 506 gaps compares favourably with the current human reference  
342 genome sequence (GRCh38.p12) that has a contig N50 of 57,879,411 bp and 875 gaps  
343 (Table 3). Indeed, considering only the chromosome assemblies built on PacBio long read  
344 data (i.e. Sscrofa11 - the autosomes SSC1-SSC18 plus SSCX), there are fewer gaps in the  
345 pig assembly than in human reference autosomes and HSAX assemblies. Most of the gaps  
346 in the Sscrofa11.1 reference assembly are attributed to the fragmented assembly of SSCY.  
347 The capturing of centromeres and telomeres for several chromosomes (Supplementary  
348 Tables ST5, ST6; Supplementary Figures SF9, SF10) provides further evidence that the  
349 Sscrofa11.1 assembly is more complete. The increased contiguity of Sscrofa11.1 is evident  
350 in the graphical comparison to Sscrofa10.2 illustrated in Figure 2.

351 The improvements in the reference genome sequence (Sscrofa11.1) relative to the draft  
352 assembly (Sscrofa10.2)<sup>13</sup> are not restricted to greater continuity and fewer gaps. The major  
353 flaws in the BAC clone-based draft assembly were i) failures to resolve the sequence  
354 redundancy amongst sequence contigs within BAC clones and between adjacent  
355 overlapping BAC clones and ii) failures to accurately order and orient the sequence contigs  
356 within BAC clones. Although the Sanger sequencing technology used has a much lower raw  
357 error rate than the PacBio technology, the sequence coverage was only 4-6 fold across the  
358 genome. The improvements in continuity and quality (Table 2; Supplementary Figures SF13-  
359 15) have yielded a better template for annotation resulting in better gene models. The  
360 Sscrofa11.1 and USMARCv1.0 assemblies are classed as 4|4|1 and 3|5|1 [10<sup>x</sup>: N50 contig

361 (kb); 10<sup>Y</sup>: N50 scaffold (kb); Z = 1|0: assembled to chromosome level] respectively  
362 compared to Sscrofa10.2 as 1|2|1 and the human GRCh38p5 assembly as 4|4|1 (see  
363 <https://geval.sanger.ac.uk>).

364 The improvement in the complete BUSCO (Benchmarking Universal Single-Copy Orthologs)  
365 genes indicates that both Sscrofa11.1 and USMARCv1.0 represent superior templates for  
366 annotation of gene models than the draft Sscrofa10.2 assembly (Supplementary Table ST3).  
367 Further, a companion bioinformatics analysis of available Iso-seq and companion Illumina  
368 RNA-seq data across the nine tissues surveyed has identified a large number (>54,000) of  
369 novel transcripts<sup>32</sup>. A majority of these transcripts are predicted to be spliced and validated  
370 by RNA-seq data. Beiki and colleagues identified 10,465 genes expressing Iso-seq  
371 transcripts that are present on the Sscrofa11.1 assembly, but which are unannotated in  
372 current NCBI or Ensembl annotations.

373 We demonstrate moderate improvements in the placement and ordering of commercial SNP  
374 genotyping markers on the Sscrofa11.1 reference genome which will impact future genomic  
375 selection programs. The reference-derived order of SNP markers plays a significant role in  
376 imputation accuracy, as demonstrated by a whole-genome survey of misassembled regions  
377 in cattle that found a correlation between imputation errors and misassemblies<sup>35</sup>. We  
378 identified 1,709, 56, and 224 markers on the PorcineSNP60, GGP LD and 80K commercial  
379 chips that were previously unmapped and now have coordinates on the Sscrofa11.1  
380 reference (Supplementary Table ST8). These newly mapped markers can now be imputed  
381 into a cross-platform, common set of SNP markers for use in genomic selection. Additionally,  
382 we have identified areas of the genome that are poorly tracked by the current set of  
383 commercial SNP markers. The previous Sscrofa10.2 reference had an average marker  
384 spacing of 3.57 kbp (Stdev: 26.5 kb) with markers from four commercial genotyping arrays.  
385 We found this to be an underestimate of the actual distance between markers, as the  
386 Sscrofa11.1 reference coordinates consisted of an average of 3.91 kbp (Stdev: 14.9 kbp)  
387 between the same set of markers. We also found a region of 2.56 Mbp that is currently  
388 devoid of suitable markers on the new reference. These gaps in marker coverage will inform

389 future marker selection surveys, which are likely to prioritize regions of the genome that are  
390 not currently being tracked by marker variants in close proximity to potential causal variant  
391 sites.

392 The cost of high coverage whole-genome sequencing (WGS) precludes it from routine use in  
393 breeding programs. However, it has been suggested that low coverage WGS followed by  
394 imputation of haplotypes may be a cost-effective replacement for SNP arrays in genomic  
395 selection<sup>36</sup>. Imputation from low coverage sequence data to whole genome information has  
396 been shown to be highly accurate<sup>37,38</sup>. At the 2018 World Congress on Genetics Applied to  
397 Livestock Production Aniek Bouwman reported that in a comparison of Sscrofa10.2 with  
398 Sscrofa11.1 (for SSC7 only) for imputation from 600K SNP genotypes to whole genome  
399 sequence overall imputation accuracy on SSC7 improved considerably from 0.81 (1,019,754  
400 variants) to 0.90 (1,129,045 variants) (Aniek Bouwman, pers. comm). Thus, the improved  
401 assembly may not only serve as a better template for discovering genetic variation but also  
402 have advantages for genomic selection, including improved imputation accuracy.

403 Advances in the performance of long read sequencing and scaffolding technologies,  
404 improvements in methods for assembling the sequence reads and reductions in costs are  
405 enabling the acquisition of ever more complete genome sequences for multiple species and  
406 multiple individuals within a species. For example, in terms of adding species, the Vertebrate  
407 Genomes Project (<https://vertebrategenomesproject.org/>) aims to generate error-free, near  
408 gapless, chromosomal level, haplotyped phase assemblies of all of the approximately  
409 66,000 vertebrate species and is currently in its first phase that will see such assemblies  
410 created for an exemplar species from all 260 vertebrate orders. At the level of individuals  
411 within a species, smarter assembly algorithms and sequencing strategies are enabling the  
412 production of high quality truly haploid genome sequences for outbred individuals<sup>24</sup>. The  
413 establishment of assembled genome sequences for key individuals in the nucleus  
414 populations of the leading pig breeding companies is achievable and potentially affordable.  
415 However, 10-30x genome coverage short read data generated on the Illumina platform and



416 aligned to a single reference genome is likely to remain the primary approach to sequencing  
417 multiple individuals within farmed animal species such as cattle and pigs<sup>21,39</sup>.

418 There are significant challenges in making multiple assembled genome resources useful and  
419 accessible. The current paradigm of presenting a reference genome as a linear  
420 representation of a haploid genome of a single individual is an inadequate reference for a  
421 species. As an interim solution the Ensembl team are annotating multiple assemblies for  
422 some species such as mouse ([https://www.ensembl.org/Mus\\_musculus/Info/Strains](https://www.ensembl.org/Mus_musculus/Info/Strains))<sup>40</sup>. We  
423 are currently implementing this solution for pig genomes, including an annotated  
424 USMARCv1.0 that will facilitated the detailed comparison of the two assemblies described  
425 here.

426 The current human genome reference already contains several hundred alternative  
427 haplotypes and it is expected that the single linear reference genome of a species will be  
428 replaced with a new model – the graph genome<sup>41,42,43</sup>. These paradigm shifts in the  
429 representation of genomes present challenges for current sequence alignment tools and the  
430 'best-in-genome' annotations generated thus far. The generation of high quality annotation  
431 remains a labour-intensive and time-consuming enterprise. Comparisons with the human  
432 and mouse reference genome sequences which have benefited from extensive manual  
433 annotation indicate that there is further complexity in the porcine genome as yet unannotated  
434 (Table 3). It is very likely that there are many more transcripts, pseudogenes and non-coding  
435 genes (especially long non-coding genes), to be discovered and annotated on the pig  
436 genome sequence<sup>32</sup>. The more highly continuous pig genome sequences reported here  
437 provide an improved framework against which to discover functional sequences, both coding  
438 and regulatory, and sequence variation. After correction for some contig/scaffold inversions  
439 in the USMARCv1.0 assembly, the overall agreement between the assemblies is quite high  
440 and illustrates that the majority of genomic variation is at smaller scales of structural  
441 variation. However, both assemblies still represent a composite of the two parental genomes  
442 present in the animals, with unknown effects of haplotype switching on the local accuracy  
443 across the assembly.

444 Future developments in high quality genome sequences for the domestic pig are likely to  
445 include: (i) gap closure of Sscrofa11.1 to yield an assembly with one contig per (autosomal)  
446 chromosome arm exploiting the isogenic BAC and fosmid clone resource as illustrated here  
447 for chromosome 16 and 18; and (ii) haplotype resolved assemblies of a Meishan and White  
448 Composite F1 crossbred pig currently being sequenced. Beyond this haplotype resolved  
449 assemblies for key genotypes in the leading pig breeding company nucleus populations and  
450 of miniature pig lines used in biomedical research can be anticipated in the next 5 years.  
451 Unfortunately, some of these genomes may not be released into the public domain. The first  
452 wave of results from the Functional Annotation of ANimal Genomes (FAANG) initiative  
453 (Andersson *et al.*, 2015; Foissac *et al.*, 2018), are emerging and will add to the richness of  
454 pig genome annotation.

455 In conclusion, the new pig reference genome (Sscrofa11.1) described here represents a  
456 significantly enhanced resource for genetics and genomics research and applications for a  
457 species of importance to agriculture and biomedical research.

458

459 **Acknowledgements**

460 We are grateful for funding support from the i) Biotechnology and Biological Sciences  
461 Research Council (Institute Strategic Programme grants: BBS/E/D/20211550,  
462 BBS/E/D/10002070; and response mode grants: BB/F021372/1, BB/M011461/1,  
463 BB/M011615/1, BB/M01844X/1); ii) European Union through the Seventh Framework  
464 Programme Quantomics (KBBE222664); iii) University of Cambridge, Department of  
465 Pathology; iv) Wellcome Trust: WT108749/Z/15/Z; v) European Molecular Biology  
466 Laboratory; and vi) the Roslin Foundation. In addition HL and HB were supported by USDA  
467 NRSP-8 Swine Genome Coordination funding; SK and AMP were supported by the  
468 Intramural Research Program of the National Human Genome Research Institute, US  
469 National Institutes of Health; D.M.B was supported by USDA CRIS projects 8042-31000-  
470 001-00-D and 5090-31000-026-00-D. B.D.R was supported by USDA CRIS project 8042-  
471 31000-001-00-D. T.P.L.S. was supported by USD CRIS project 3040-31000-100-00-D. This  
472 work used the computational resources of the NIH HPC Biowulf cluster (<https://hpc.nih.gov>);  
473 and the Iowa State University Lightning3 and ResearchIT clusters. The Ceres cluster (part of  
474 the USDA SCInet Initiative) was used to analyse part of this dataset.  
475 We are grateful to Chris Tyler-Smith (Wellcome Trust Sanger Institute) for sharing the SSCY  
476 sequence data for Sscrofa11.1.

477

478

479 **Author contributions**

480 A.L.A. and T.P.L.S. conceived, coordinated and managed the project; A.L.A., P.F., D.A.H.,  
481 T.P.L.S. M.W. supervised staff and students performing the analyses; D.J.N., L.R., L.B.S.,  
482 T.P.L.S. provided biological resources; R.H., K.S.K. and T.P.L.S. generated PacBio  
483 sequence data; H.A.F., T.P.L.S. and R.T. generated Illumina WGS and RNA-Seq data;  
484 N.A.A., C.A.S., B.M.S. provided SSCY assemblies; D.J.N, and T.P.L.S. generated Iso-Seq  
485 data; G.H., R.H., S.K., A.M.P., A.S.S, A.W. generated sequence assemblies; A.W. polished  
486 and quality checked Sscrofa11.1; W.C., G.H., K.H., S.K., B.D.R., A.S.S., S.G.S., E.T.  
487 performed quality checks on the sequence assemblies; R.E.O'C. and D.K.G. performed  
488 cytogenetics analyses; L.E. analysed repeat sequences; H.B., H.L., N.M., C.K.T. analysed  
489 Iso-Seq data; D.M.B. and G.A.R. analysed sequence variants; B.A., K.B., C.G.G., T.H., O.I.,  
490 F.J.M. annotated the assembled genome sequences; A.W. and A.L.A drafted the  
491 manuscript; all authors read and approved the final manuscript.

## 492 References

- 493 1. Ramos, A. M. *et al.* Design of a high density SNP genotyping assay in the pig using  
494 SNPs identified and characterized by next generation sequencing technology. *PLoS*  
495 *One* **4**, e6524 (2009).
- 496 2. Hu, Z. L., Park, C. A. & Reecy, J. M. Developmental progress and current status of  
497 the Animal QTLdb. *Nucleic Acids Res.* **44**, D827–D833 (2016).
- 498 3. Meuwissen, T., Hayes, B. & Goddard, M. Accelerating Improvement of Livestock with  
499 Genomic Selection. *Annu. Rev. Anim. Biosci.* **1**, 221–237 (2013).
- 500 4. Christensen, O. F., Madsen, P., Nielsen, B., Ostersen, T. & Su, G. Single-step  
501 methods for genomic evaluation in pigs. *Animal* **6**, 1565–1571 (2012).
- 502 5. Cleveland, M. A. & Hickey, J. M. Practical implementation of cost-effective genomic  
503 selection in commercial pig breeding using imputation. *J. Anim. Sci.* **91**, 3583–3592  
504 (2013).
- 505 6. Vamathevan, J. J. *et al.* Minipig and beagle animal model genomes aid species  
506 selection in pharmaceutical discovery and development. *Toxicol. Appl. Pharmacol.*  
507 **270**, 149–57 (2013).
- 508 7. Klymiuk, N. *et al.* Tailored Pig Models for Preclinical Efficacy and Safety Testing of  
509 Targeted Therapies. *Toxicol. Pathol.* **44**, 346–357 (2016).
- 510 8. Wells, K. D. & Prather, R. S. Genome-editing technologies to improve research,  
511 reproduction, and production in pigs. *Mol. Reprod. Dev.* **84**, 1012–1017 (2017).
- 512 9. Servin, B., Faraut, T., Iannuccelli, N., Zelenika, D. & Milan, D. High-resolution  
513 autosomal radiation hybrid maps of the pig genome and their contribution to the  
514 genome sequence assembly. *BMC Genomics* **13**, 585 (2012).
- 515 10. Tortereau, F. *et al.* A high density recombination map of the pig reveals a correlation  
516 between sex-specific recombination and GC content. *BMC Genomics* **13**, 586 (2012).
- 517 11. Yerle, M. *et al.* The PiGMaP consortium cytogenetic map of the domestic pig (*Sus*  
518 *scrofa domestica*). *Mamm. Genome* **6**, 176–186 (1995).
- 519 12. Humphray, S. J. *et al.* A high utility integrated map of the pig genome. *Genome Biol.*

- 520           **8**, R139 (2007).
- 521   13.   Groenen, M. A. M. *et al.* Analyses of pig genomes provide insight into porcine  
522       demography and evolution. *Nature* **491**, 393–398 (2012).
- 523   14.   Warr, A. *et al.* Identification of Low-Confidence Regions in the Pig Reference Genome  
524       (SsCrofa 10.2). *Front. Genet.* **6**, 338 (2015).
- 525   15.   O'Connor, R. E. *et al.* Isolation of subtelomeric sequences of porcine chromosomes  
526       for translocation screening reveals errors in the pig genome assembly. *Anim. Genet.*  
527       **48**, 395–403 (2017).
- 528   16.   Dawson, H. D., Chen, C., Gaynor, B., Shao, J. & Urban Jr., J. F. The porcine  
529       translational research database: a manually curated, genomics and proteomics-based  
530       research resource. *BMC Genomics* **18**, 643 (2017).
- 531   17.   Li, M. *et al.* Comprehensive variation discovery and recovery of missing sequence in  
532       the pig genome using multiple de novo assemblies. *Genome Res.* **27**, 865–874  
533       (2017).
- 534   18.   Schook, L. B. *et al.* Swine Genome Sequencing Consortium (SGSC): A strategic  
535       roadmap for sequencing the pig genome. in *Comparative and Functional Genomics* **6**,  
536       251–255 (2005).
- 537   19.   Robert, C. *et al.* Design and development of exome capture sequencing for the  
538       domestic pig (*Sus scrofa*). *BMC Genomics* **15**, 550 (2014).
- 539   20.   Skinner, B. M. *et al.* The pig X and Y Chromosomes: structure, sequence, and  
540       evolution. *Genome Res.* **26**, 130–139 (2016).
- 541   21.   Frantz, L. A. F. *et al.* Evidence of long-term gene flow and selection during  
542       domestication from analyses of Eurasian wild and domestic pig genomes. *Nat. Genet.*  
543       **47**, 1141-1148 (2015).
- 544   22.   Groenen, M. A. M. A decade of pig genome sequencing: a window on pig  
545       domestication and evolution. *Genet. Sel. Evol.* **48**, 23 (2016).
- 546   23.   van Dijk, E. L., Jaszczyszyn, Y., Naquin, D. & Thermes, C. The Third Revolution in  
547       Sequencing Technology. *Trends in Genetics* **34**, 666-681 (2018).

- 548 24. Koren, S. *et al.* De novo assembly of haplotype-resolved genomes with trio binning.  
549 *Nat. Biotechnol.* **36**, 1174-1182 (2018).
- 550 25. Putnam, N. H. *et al.* Chromosome-scale shotgun assembly using an in vitro method  
551 for long-range linkage. *Genome Res.* **26**, 342–350 (2016).
- 552 26. Chin, C. S. *et al.* Phased diploid genome assembly with single-molecule real-time  
553 sequencing. *Nat. Methods* **13**, 1050–1054 (2016).
- 554 27. Kurtz, S. *et al.* Versatile and open software for comparing large genomes. *Genome*  
555 *Biol.* **5**, R12 (2004).
- 556 28. English, A. C. *et al.* Mind the Gap: Upgrading Genomes with Pacific Biosciences RS  
557 Long-Read Sequencing Technology. *PLoS One* **7**, e47768 (2012).
- 558 29. Chow, W. *et al.* gEVAL-a web-based browser for evaluating genome assemblies.  
559 *Bioinformatics* **32**, 2508–2510 (2016).
- 560 30. Berlin, K. *et al.* Assembling large genomes with single-molecule sequencing and  
561 locality-sensitive hashing. *Nat. Biotechnol.* **33**, 623–630 (2015).
- 562 31. Simão, F. A., Waterhouse, R. M., Ioannidis, P., Kriventseva, E. V. & Zdobnov, E. M.  
563 BUSCO: Assessing genome assembly and annotation completeness with single-copy  
564 orthologs. *Bioinformatics* **31**, 3210–3212 (2015).
- 565 32. Beiki, H. *et al.* Improved annotation of the domestic pig genome through integration of  
566 Iso-Seq and RNA-seq data. *BMC Genomics* **20**, 344 (2019).
- 567 33. Long, Y. *et al.* A genome-wide association study of copy number variations with  
568 umbilical hernia in swine. *Anim. Genet.* **47**, 298–305 (2016).
- 569 34. Cunningham, F. *et al.* Ensembl 2019. *Nucleic Acids Res.* **47**(D1), D745-D751.
- 570 35. Utsunomiya, A. T. H. *et al.* Revealing misassembled segments in the bovine  
571 reference genome by high resolution linkage disequilibrium scan. *BMC Genomics* **17**,  
572 705 (2016).
- 573 36. Hickey, J. M. Sequencing millions of animals for genomic selection 2.0. *Journal of*  
574 *Animal Breeding and Genetics* **130**, 331–332 (2013).
- 575 37. Le, S. Q. & Durbin, R. SNP detection and genotyping from low-coverage sequencing

- 576 data on multiple diploid samples. *Genome Res.* 21, 952-960 (2011).
- 577 38. Li, Y., Sidore, C., Kang, H. M., Boehnke, M. & Abecasis, G. R. Low-coverage  
578 sequencing: Implications for design of complex trait association studies. *Genome*  
579 *Res.* 21, 940-951 (2011).
- 580 39. Daetwyler, H. D. *et al.* Whole-genome sequencing of 234 bulls facilitates mapping of  
581 monogenic and complex traits in cattle. *Nat. Genet.* 46, 858-865 (2014).
- 582 40. Lilue, J. *et al.* Sixteen diverse laboratory mouse reference genomes define strain-  
583 specific haplotypes and novel functional loci. *Nat. Genet.* 50, 1574-1583 (2018).
- 584 41. Baier, U., Beller, T. & Ohlebusch, E. Graphical pan-genome analysis with compressed  
585 suffix trees and the Burrows-Wheeler transform. *Bioinformatics* **32**, 497–504 (2015).
- 586 42. Chaisson, M. J. P., Wilson, R. K. & Eichler, E. E. Genetic variation and the de novo  
587 assembly of human genomes. *Nat. Rev. Genet.* **16**, 627–640 (2015).
- 588 43. Garrison, E. *et al.* Variation graph toolkit improves read mapping by representing  
589 genetic variation in the reference. *Nature Biotechnology* 36,875-879 (2018).
- 590 44. Andersson, L. *et al.* Coordinated international action to accelerate genome-to-  
591 phenome with FAANG, the Functional Annotation of Animal Genomes project.  
592 *Genome Biol.* **16**, 57 (2015).
- 593 45. Foissac, Sylvain; Djebali, Sarah; Munyard, Kylie; Villa-Vialaneix, Nathalie; Rau,  
594 Andrea; Muret, Kevin; Esquerre, Diane; Zytnicki, Matthias; Derrien, Thomas; Bardou,  
595 Philippe; Blanc, Fany; Cabau, Cedric; Crisci, Elisa; Dhorne-Pollet, Sophie; Drouet,  
596 Franc, E. Livestock genome annotation: transcriptome and chromatin structure  
597 profiling in cattle, goat and pig. *bioRxiv* (2018). doi:<https://doi.org/10.1101/316091>  
598



599 **Table 1:** Summary statistics for assembled pig genome sequences and comparison with current human reference genome<sup>§</sup>

600

| Assembly                     | Sscrofa10.2   | Sscrofa11     | Sscrofa11.1   | USMARCv1.0    | GRCh38.p12    |
|------------------------------|---------------|---------------|---------------|---------------|---------------|
| Total sequence length        | 2,808,525,991 | 2,456,768,445 | 2,501,912,388 | 2,755,438,182 | 3,099,706,404 |
| Total ungapped length        | 2,519,152,092 | 2,454,899,091 | 2,472,047,747 | 2,623,130,238 | 2,948,583,725 |
| Number of scaffolds          | 9,906         | 626           | 706           | 14,157        | 472           |
| Gaps between scaffolds       | 5,323         | 24            | 93            | 0             | 349           |
| Number of unplaced scaffolds | 4,562         | 583           | 583           | 14,136        | 126           |
| Scaffold N50                 | 576,008       | 88,231,837    | 88,231,837    | 131,458,098   | 67,794,873    |
| Scaffold L50                 | 1,303         | 9             | 9             | 9             | 16            |
| Number of unspanned gaps     | 5,323         | 24            | 93            | 0             | 349           |
| Number of spanned gaps       | 233,116       | 79            | 413           | 661           | 526           |
| Number of contigs            | 243,021       | 705           | 1,118         | 14,818        | 998           |
| Contig N50                   | 69,503        | 48,231,277    | 48,231,277    | 6,372,407     | 57,879,411    |
| Contig L50                   | 8,632         | 15            | 15            | 104           | 18            |
| Number of chromosomes*       | *21           | 19            | *21           | *21           | 24            |

601 <sup>§</sup>source: NCBI, <https://www.ncbi.nlm.nih.gov/assembly/>

602 \* includes mitochondrial genome

603

604 **Table 2:** Summary of quality statistics for SSC1-18, SSCX

|                                                         | Mean<br>(Sscrofa11) | Std<br>(Sscrofa11) | Bases<br>(Sscrofa11) | % genome<br>(Sscrofa11) | % genome<br>(Sscrofa10.2) |
|---------------------------------------------------------|---------------------|--------------------|----------------------|-------------------------|---------------------------|
| High Coverage                                           | 50                  | 7                  | 119,341,205          | 4.9                     | 2.6                       |
| Low Coverage (LC)                                       | 50                  | 7                  | 185,385,536          | 7.5                     | 26.6                      |
| % Properly paired                                       | 86                  | 6.8                | 95,508,007           | 3.9                     | 4.95                      |
| % High inserts                                          | 0.3                 | 1.6                | 40,835,320           | 1.72                    | 1.52                      |
| % Low inserts                                           | 8.2                 | 4.3                | 114,793,298          | 4.7                     | 3.99                      |
| Low quality (LQ)                                        | -                   | -                  | 284,838,040          | 11.6                    | 13.85                     |
| Total LQLC                                              | -                   | -                  | 399,927,747          | 16.3                    | 33.07                     |
| LQLC windows that do not intersect RepeatMasker regions |                     |                    | 39,918,551           | 1.6                     |                           |

605 Quality measures and terms as defined<sup>14</sup>

606

607 **Table 3:** Ensembl annotation of pig (Sscrofa10.2, Sscrofa11.1, USMARCv1.0), human (GRCh38.p12) and mouse (GRCm38.p6) assemblies

|                          | Sscrofa10.2                       | Sscrofa11.1          | USMARCv1.0           | GRCh38.p12                      | GRCm38.p6                       |
|--------------------------|-----------------------------------|----------------------|----------------------|---------------------------------|---------------------------------|
|                          | Ensembl (Release 89)              | Ensembl (Release 95) | Ensembl (Release 97) | Ensembl (Release 97)            | Ensembl (Release 97)            |
| Coding genes             | 21,630<br>(Incl. 10 read through) | 22,452               | 21,535               | 20,454<br>incl 660 read through | 22,480<br>incl 271 read through |
| Non-coding genes         | 3,124                             | 3,250                | 6,113                | 23,940                          | 16,324                          |
| small non-coding genes   | 2,804                             | 2,503                | 2,427                | 4,871                           | 5,531                           |
| long non-coding genes    | 135<br>(incl 1 read through)      | 361                  | 3,307                | 16,848<br>incl 302 read through | 10,231<br>incl 74 read through  |
| misc. non-coding genes   | 185                               | 386                  | 379                  | 2,221                           | 562                             |
| Pseudogenes              | 568                               | 178                  | 674                  | 15,204<br>incl 8 read through   | 13,528<br>incl 5 read through   |
| Gene transcripts         | 30,585                            | 49,448               | 58,692               | 226,950                         | 142,333                         |
|                          |                                   |                      |                      |                                 |                                 |
| Genscan gene predictions | 52,372                            | 46,573               | 58,692               | 51,153                          | 57,381                          |
| Short variants           | 60,389,665                        | 64,310,125           |                      | 665,834,144                     | 83,761,978                      |
| Structural variants      | 224,038                           | 224,038              |                      | 6,013,111                       | 791,878                         |

608

609

610 **Figure 1:** Plot illustrating co-linearity between radiation hybrid map and a) Sscrofa11.1 and b) USMARCv1.0 assemblies (autosomes only)

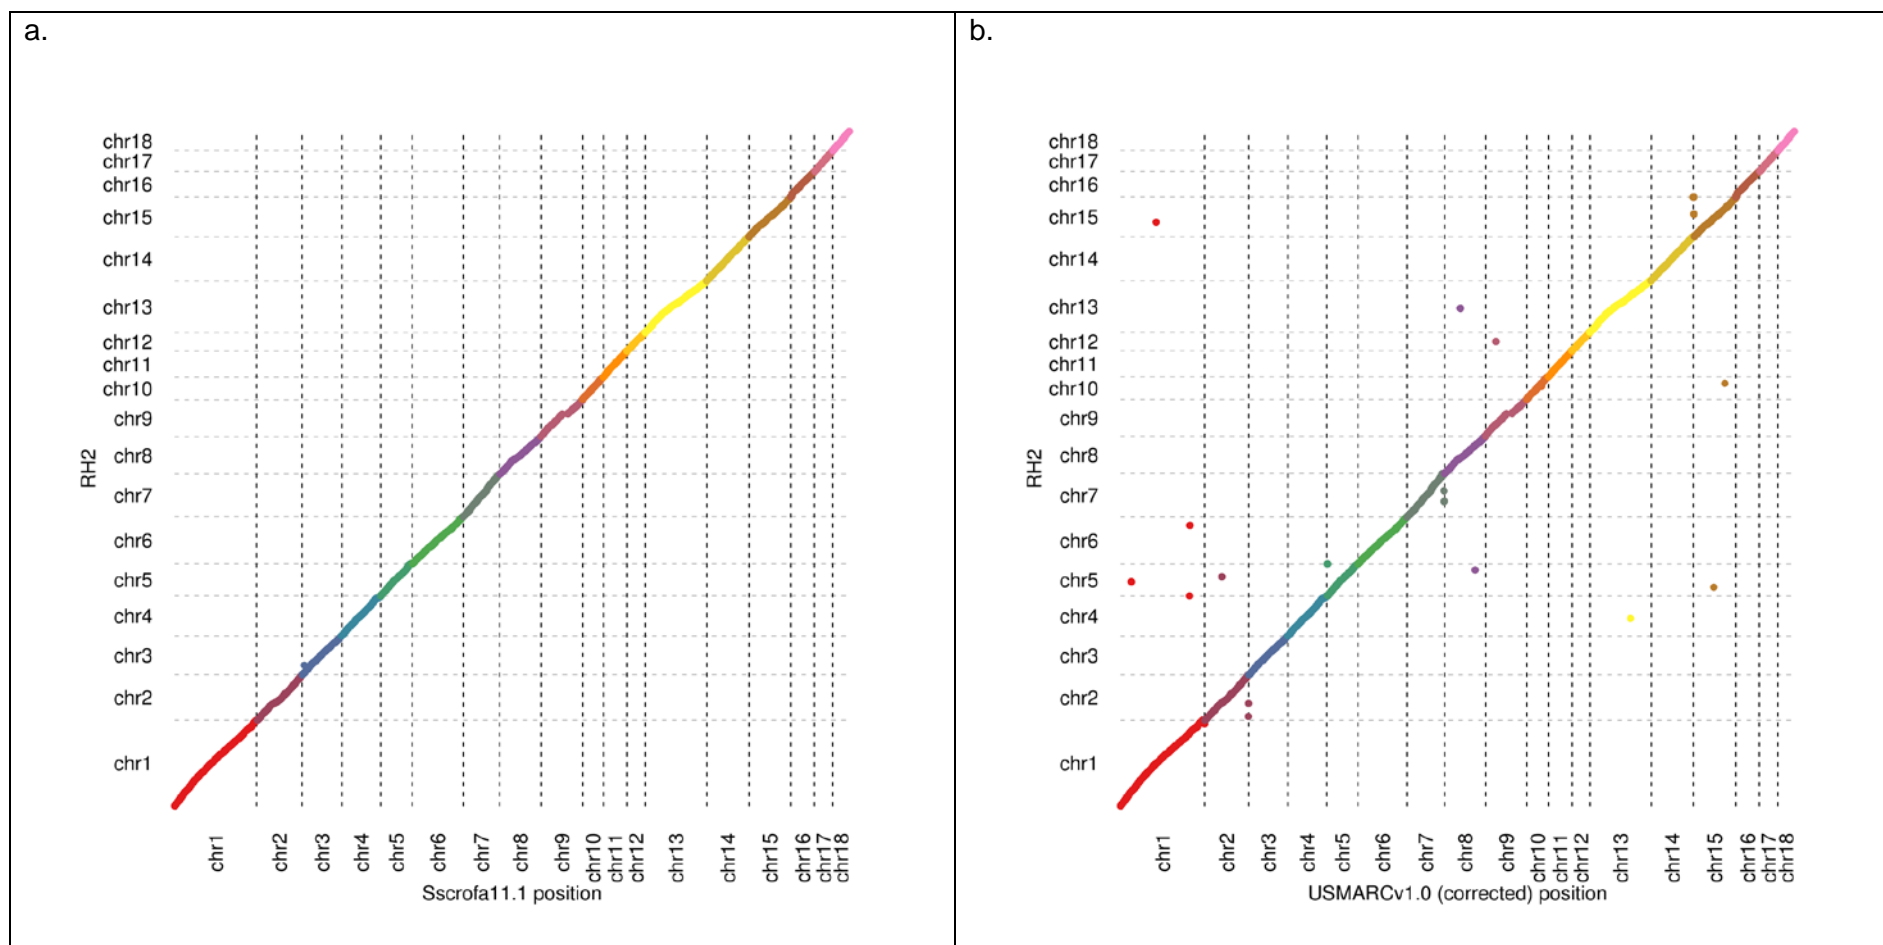

611

612

613 **Figure 2:** Graphical visualisation of contigs for Sscrofa11 (top) and Sscrofa10.2 (bottom) as  
614 alternating dark and light grey bars

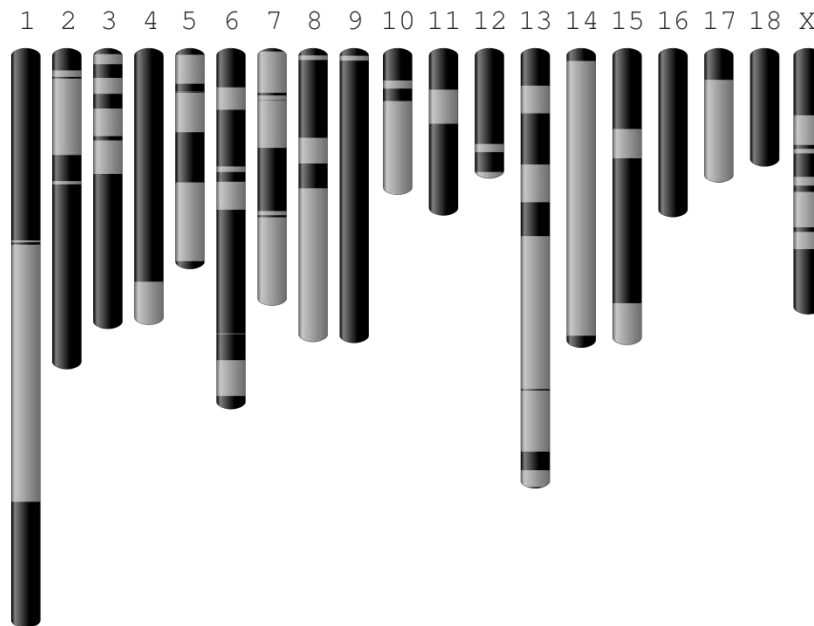

615

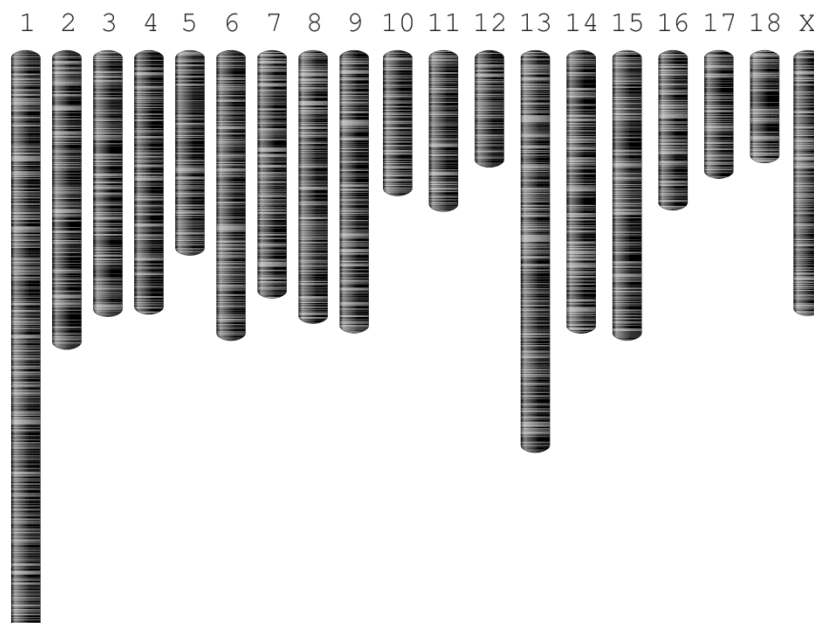

616
